# Supplementary material for: High potential for CH 4 emission mitigation from oil infrastructure in one of EU’s major production regions
Source: Copernicus journal article supplement (doi:10.5194/egusphere-2023-247), 2023-02-27
Supplement: Supplementary file 1 [file egusphere-2023-247-supplement.pdf]

# Supplementary Material for

## High methane mitigation potential from oil infrastructure in one of EU's major production regions

Foteini Stavropoulou<sup>1,\*</sup>, Katarina Vinković<sup>2,\*</sup>, Bert Kers<sup>2</sup>, Marcel de Vries<sup>2</sup>, Steven van Heuven<sup>2</sup>, Piotr Korbeń<sup>3</sup>, Martina Schmidt<sup>3</sup>, Julia Wietzel<sup>3</sup>, Pawel Jagoda<sup>4</sup>, Jaroslav M. Necki<sup>4</sup>, Jakub Bartyzel<sup>4</sup>, Hossein Maazallahi<sup>1</sup>, Malika Menoud<sup>1</sup>, Carina van der Veen<sup>1</sup>, Sylvia Walter<sup>1</sup>, Béla Tuzson<sup>5</sup>, Jonas Ravelid<sup>5</sup>, Randolph Paulo Morales<sup>5</sup>, Lukas Emmenegger<sup>5</sup>, Dominik Brunner<sup>5</sup>, Michael Steiner<sup>5</sup>, Arjan Hensen<sup>6</sup>, Ilona Velzeboer<sup>6</sup>, Pim van den Bulk<sup>6</sup>, Hugo Denier van der Gon<sup>6</sup>, Antonio Delre<sup>7</sup>, Maklawe Essonanawe Edjabou<sup>7</sup>, Charlotte Scheutz<sup>7</sup>, Marius Corbu<sup>8,9</sup>, Sebastian Iancu<sup>9</sup>, Denisa Moaca<sup>9</sup>, Alin Scarlat<sup>8,9</sup>, Alexandru Tudor<sup>8,9</sup>, Ioana Vizireanu<sup>9</sup>, Andreea Calcan<sup>9</sup>, Magdalena Ardelean<sup>9</sup>, Sorin Ghemulet<sup>9</sup>, Alexandru Pana<sup>9</sup>, Aurel Constantinescu<sup>9</sup>, Lucian Cusa<sup>9</sup>, Alexandru Nica<sup>9</sup>, Calin Baciu<sup>10</sup>, Cristian Pop<sup>10</sup>, Andrei Radovici<sup>10</sup>, Alexandru Mereuta<sup>10</sup>, Horatiu Stefanie<sup>10</sup>, Bas Hermans<sup>11</sup>, Stefan Schwietzke<sup>12</sup>, Daniel Zavala-Araiza<sup>1, 12</sup>, Huilin Chen<sup>2, 13\*\*</sup>, Thomas Röckmann<sup>1,\*\*</sup>

<sup>1</sup>Institute for Marine and Atmospheric Research Utrecht (IMAU), Utrecht University, the Netherlands

<sup>2</sup>Centre for Isotope Research (CIO), Energy and Sustainability Research Institute Groningen, University of Groningen, The Netherlands

<sup>3</sup>Institute of Environmental Physics, University of Heidelberg, Heidelberg, Germany

<sup>4</sup>Faculty of Physics and Applied Computer Science, AGH University of Science and Technology in Cracow, Cracow, Poland

<sup>5</sup>Laboratory for Air Pollution/Environmental Technology, Empa – Swiss Federal Laboratories for Materials Science and Technology, Überlandstrasse 129, CH-8600 Dübendorf

<sup>6</sup>Department of Environmental Modelling, Sensing & Analysis, TNO, the Netherlands

<sup>7</sup>Department of Environmental Engineering, Technical University of Denmark, Denmark

<sup>8</sup> Faculty of Physics, University of Bucharest, P.O. Box MG-11, Magurele, 077125, Bucharest, Romania

<sup>9</sup> National Institute for Aerospace Research “Elie Carafoli” – INCAS Bucharest, Romania

<sup>10</sup>Faculty of Environmental Science and Engineering, Babes-Bolyai University, Cluj-Napoca, Romania

<sup>11</sup> Intero - The Sniffers, Poeierstraat 14, 2490 Balen, Belgium

<sup>12</sup>Environmental Defense Fund, Berlin, Germany and Amsterdam, The Netherlands

<sup>13</sup>Joint International Research Laboratory of Atmospheric and Earth System Sciences, School of Atmospheric Sciences, Nanjing University, Nanjing, China

\* These authors contributed equally to the manuscript

\*\* corresponding authors

39 **Table of Contents**

40

41 S1. Overview of facility scale quantifications with all methods .....2

42 S2. Facility scale measurement methods ..... 3

43 S3. Statistical tests for lognormality .....5

44 S4. Determination of emissions distributions and emission factors.....6

45 S5. “Non-detects” and Detection Limit ..... 7

46 S6. Alternative determination of non-detects from screening data .....9

47 S7. Alternative up-scaling approaches ..... 10

48 S8. Sensitivity analysis of the statistical estimator .....15

49 S9. Histograms and fitted pdfs under the statistical estimator for each measurement

50 method used ..... 17

51 S10. Semi-quantitative evaluation of screening data.....17

52 S11. Component scale measurements ..... 19

53 S12. Comparison with CH<sub>4</sub> emissions reported from other studies.....20

54 S13. Production and age characteristics of surveyed oil wells.....20

55 S14. Data .....22

56 References..... 29

57

58

59 **S1. Overview of facility scale quantifications with all methods**

60 Table S1 provides an overview of the number of measurements performed with each

61 quantification approach at different types of production infrastructure during the ROMEO

62 campaign. Most of the quantifications were carried out for oil wells, and thus the present analysis

63 focuses on this type of sites.

64 Table S1. Overview of the number of sampled types of sites for each measurement method

65 employed during the ROMEO campaign.

| Site Type                     | Number of sites |                  |                  |           |            |
|-------------------------------|-----------------|------------------|------------------|-----------|------------|
|                               | OTM-33A         | GPM <sup>a</sup> | TDM <sup>b</sup> | MBA       | Total      |
| Oil wells                     | 54              | 68               | 25               | 31        | 178        |
| Gas wells                     | 11              | 12               | 6                | 2         | 31         |
| Other facilities <sup>c</sup> | 6               | 30               | 19               | 8         | 63         |
| Unknown                       | 6               | 1                | -                | 2         | 9          |
| <b>Total</b>                  | <b>77</b>       | <b>111</b>       | <b>50</b>        | <b>43</b> | <b>281</b> |

66 OTM-33A: Other Test Method - 33A, GPM: Gaussian Plume Method, TDM: Tracer

67 Dispersion Method, MBA: Mass Balance

68 <sup>a</sup>This category includes both GPM and “Estimates” based on one mole fraction record.

69 <sup>b</sup> BDL values estimated from the TDM team are not included in this table (see S2).  
70 <sup>c</sup> "Other facilities" include oil parks, gas compressor stations, oil deposits, oil and gas  
71 production batteries, disposal injection wells and sites mentioned as "other facilities"  
72 in the data provided by the O&G production operator.  
73

## 74 **S2. Facility scale measurement methods**

75 In the following we provide additional information on the deployment of each of the four site  
76 level quantification methods during the ROMEO campaign.  
77

### 78 **Tracer Dispersion Method**

79 The Tracer Dispersion Method (TDM) dataset and the evaluation approach that was  
80 implemented during the ROMEO campaign were previously described in Delre et al. (2022).

81 To release the tracer gas as closely as possible to the emission point, a flexible tube was  
82 pushed to the location of the well borehole by using a rod. In cases where this was not possible,  
83 such as at large area sources, the tracer was released from the side of the fence protecting the  
84 target area. Measurements of CH<sub>4</sub> and tracer gases concentrations were carried out by  
85 performing on average 9 downwind plume traverses. The site-representative methane emission  
86 rate was then calculated by averaging the emission rates estimated from the multiple traverses  
87 across the plume.

88 Delre et al. (2022) assigned upper limits of emission rates to sites where the measured plumes  
89 were Below Detection Limit (BDL). This means that the CH<sub>4</sub> mole fraction downwind a site was  
90 the same as upwind, within the analytical uncertainty. Upper limits for emission rates were  
91 assigned to these sites based on the lowest measurable emission rate that would have been  
92 detectable with the analyser. In this work, these BDL values are not used for the derivation of  
93 emission factors with our statistical approach, but they are used for the determination of the  
94 detection limit and the fraction of non-detects for the TDM dataset (see S5).  
95

### 96 **Other Test Method 33A**

97 The Other Test Method (OTM) - 33A dataset and application during the ROMEO campaign was  
98 previously described in (Korbeń et al., 2022). OTM-33A is based on stationary observations of the  
99 mole fraction of trace gases, and quantification using wind direction and speed. When an  
100 emission plume has been detected downwind of an emission point from mobile screening (see  
101 below), the vehicle is parked in the plume and mole fraction and wind information are recorded  
102 over a period of approximately 20 minutes. The CH<sub>4</sub> emission rate Q can then be calculated  
103 applying Eq. 1 (Korbeń et al., 2022).

$$104 \quad Q = 2\pi \cdot \sigma_y \cdot \sigma_z \cdot U \cdot C \quad (1)$$

105 Where  $\sigma_y$  and  $\sigma_z$  are the horizontal and vertical dispersion coefficients, U is the horizontal mean  
106 wind speed, and C is the maximum CH<sub>4</sub> mole fraction calculated with a Gaussian fit algorithm.  
107

### 108 **Gaussian Plume Method**

109 Measurements with the Gaussian Plume Method (GPM) were additionally performed by the  
110 two teams carrying out quantifications using the TDM and OTM-33A approaches as mentioned  
111 in the above sections, and the GPM dataset and application during the ROMEO campaign was  
112 also described in detail in (Korbeń et al., 2022) and (Delre et al., 2022).

113 To determine emission rates from a plume, the GPM calculates the average local-scale CH<sub>4</sub>  
 114 dispersion using an idealized approximation and assuming constant meteorological conditions  
 115 (Hanna et al., 1982). When a gas is released from an emission point, it is entrained in the  
 116 prevailing ambient air flow (defined as the *x* direction) and the dispersion from the emission point  
 117 creates an idealized cone while it disperses in the *y* and *z* direction over time. The mole fraction  
 118 of the gas at any point, and eventually the emission rate, can be calculated by using information  
 119 about the height of the source, wind speed and wind dispersion parameters (Riddick et al., 2017)  
 120 and applying Eq. 2 (Turner, 1970; Korbeń et al., 2022).

$$121 \quad C(x, y, z) = \frac{Q}{2\pi\sigma_y\sigma_zU} \exp\left(-\frac{1}{2}\left(\frac{y}{\sigma_y}\right)^2\right) \left[\exp\left(-\frac{1}{2}\left(\frac{z-H}{\sigma_z}\right)^2\right) + \exp\left(-\frac{1}{2}\left(\frac{z+H}{\sigma_z}\right)^2\right)\right] \quad (2)$$

122 where  $\sigma_y$  and  $\sigma_z$  are the horizontal and vertical dispersion coefficients,  $U$  is the mean wind speed,  
 123 and  $C$  is the maximum observed CH<sub>4</sub> mole fraction. This method can be used on public roads  
 124 without site access and measurements can be carried out in a straightforward manner and a  
 125 limited time. However, GPM modelling can introduce systematic errors that are difficult to  
 126 quantify and result in errors on emission magnitudes of at least a factor of three, if not more  
 127 (Yacovitch et al., 2015).

128 Because of site accessibility and/or wind conditions, some emitting sites could not be  
 129 successfully quantified using the TDM. In these cases, the emission rates were calculated by  
 130 fitting a Gaussian peak to the CH<sub>4</sub> enhancement recorded a few meters downwind of the site  
 131 (conceptually similar to the “screening” evaluations described in section S10). This approach uses  
 132 often only one single mole fraction record. Emission rates from this approach are referred to as  
 133 “Estimate” and they are included in the group GPM here. Delre et al. (2022) compared emission  
 134 rates derived from all three evaluation methods (TDM, GPM, “Estimates”) at 41 O&G sites. They  
 135 found lower estimates from GPM and “Estimate” evaluations compared to TDM and applied a  
 136 correction of a factor of 2 or more to the GPM and “Estimate” quantifications (Delre et al., 2022).  
 137 As stated in the main text, we do not apply this correction to GPM measurements, since a  
 138 comparison to TDM is not possible for the other measurement teams (Korbeń et al., 2022).

139 On several days of the ROMEO campaign, the C<sub>2</sub>H<sub>2</sub> analyser was not operational and the TDM  
 140 could not be applied. During these days, the GPM was applied by the same team using a CH<sub>4</sub>  
 141 analyser. Similarly, when the OTM-33A could not be applied, either because the topographic  
 142 conditions were not suitable or because the wind conditions were not appropriate, the GPM was  
 143 applied (Korbeń et al., 2022).

144

### 145 **Mass Balance Approach**

146 Two different UAV-based systems using a Mass Balance Approach (MBA) were used to  
 147 quantify the emission rates from the surveyed oil and gas facilities. Here we describe the  
 148 differences in the MBA between the active AirCore system from the University of Groningen (UG)  
 149 and the Quantum Cascade Laser Absorption Spectrometer (QCLAS) from the Swiss Federal  
 150 Institute for Materials Science and Technology (EMPA).

151 The UG MBA has been described in Vinković et al. (2022). The total CH<sub>4</sub> flux in grams per  
 152 second (gs<sup>-1</sup>) of a source is derived as:

$$Q_{CH_4} = \bar{v} \cos \bar{\theta} M_{CH_4} \bar{n}_{dryair} \sum \sum \Delta c \Delta x \Delta z, \quad (3)$$

153 where  $\bar{v}$  is the mean horizontal wind speed,  $\bar{\theta}$  is the angle between the mean wind direction and  
 154 the flight trajectory,  $M_{CH_4}$  is the molecular mass of methane,  $\bar{n}_{dryair}$  is the molar density of dry  
 155 air,  $\Delta c$  is the enhancement of the CH<sub>4</sub> mole fraction above background, and  $\Delta x$  and  $\Delta z$  are the  
 156 horizontal and the vertical increments of the integration plane, respectively. The background was  
 157 determined as the 10<sup>th</sup> percentile of the downwind flight CH<sub>4</sub> measurements as in Vinković et al.  
 158 (2022). The total uncertainty is derived by error propagation, based upon the variability and  
 159 uncertainty in each variable of the equation 3.

160 The EMPA MBA uses a cluster analysis to separate elevated mole fractions from background  
 161 measurements, and then applies ordinary kriging to each of the two cluster to interpolate the  
 162 data in space (Morales et al. 2022). The emission rate  $Q_C$  (gs<sup>-1</sup>) is then derived as:

$$Q_C = \int_{y_{min}}^{y_{max}} \int_0^{z_{max}} c(y, z) u(y, z) \cdot \hat{n} dz dy, \quad (4)$$

163 Where the  $y$ -axis is aligned with the vertical cross-section. The integral over the 2D-plane is  
 164 approximated in the observations as a discrete summation of CH<sub>4</sub> enhancement  $c(y, z)$   
 165 multiplied with the component of the horizontal vector  $u(y, z)$  normal to the vertical cross-  
 166 section. The overall error is a function of the two variables  $c$  and  $u$ . The CH<sub>4</sub> background was  
 167 determined from measurements outside of the plume of interest following the Robust Extract  
 168 Baseline Signal algorithm (Ruckstuhl et al., 2012).

169

### 170 **S3. Statistical tests for lognormality**

171 To examine if our sampled data follow a lognormal distribution, we first log-transform the  
 172 measured site-level emission rates. The Shapiro-Wilk and Lilliefors tests for normality are then  
 173 used to determine if the log-transformed data are normally distributed. These two tests are  
 174 appropriate in a situation where the parameters ( $\mu$  and  $\sigma$ ) of the null distribution are unknown.  
 175 Previous studies have found that the Shapiro-Wilk test is the most powerful normality test and  
 176 the performance of Lilliefors test is comparable with Shapiro-Wilk test (Razali and Wah, 2011).  
 177 We perform the tests for the subset of oil wells including measurements above the detection  
 178 limit of each method. The null hypothesis for the tests is that the log transformed emissions data  
 179 comes from a normal distribution, with critical P-value of 0.05. The statistical tests were  
 180 performed in *Python* using the scientific computation libraries *SciPy* (Virtanen et al., 2020) and  
 181 *statsmodels* (Seabold and Perktold, 2010).

182 Table S2 shows the results from both statistical tests for each tested dataset. For the subset  
 183 of oil wells, the null hypothesis of lognormality is accepted by both the Shapiro-Wilk and Lilliefors  
 184 test for all four measurement methods. Therefore, we conclude that for oil wells, the assumption  
 185 that the distribution of site-level emissions rates above the detection limit follows a lognormal  
 186 distribution is valid. For the screenings, the null hypothesis of lognormality is rejected for three  
 187 out of five datasets. We decide to apply the statistical estimator for the subset of oil wells to  
 188 qualitatively compare the results between the quantifications and the screenings. However, we  
 189 acknowledge that the lognormal distribution might not characterize the distribution from the  
 190 screenings accurately.

191 Table S2. Results from the Shapiro-Wilk test and the Lilliefors test of lognormality for each tested  
 192 dataset.

| Grouping | Shapiro – Wilk test | Lilliefors test |
|----------|---------------------|-----------------|
|----------|---------------------|-----------------|

|                         | P-value <sup>a</sup> | Result | P-value <sup>a</sup> | Result |
|-------------------------|----------------------|--------|----------------------|--------|
| OTM-33A                 | 0.723                | Pass   | 0.229                | Pass   |
| GPM                     | 0.177                | Pass   | 0.504                | Pass   |
| TDM                     | 0.100                | Pass   | 0.096                | Pass   |
| MBA                     | 0.494                | Pass   | 0.682                | Pass   |
| All quantifications     | 0.121                | Pass   | 0.646                | Pass   |
| <hr/>                   |                      |        |                      |        |
| Screenings <sup>b</sup> |                      |        |                      |        |
| Vehicle 1               | 0.018                | Fail   | 0.001                | Fail   |
| Vehicle 2               | 0.940                | Pass   | 0.573                | Pass   |
| Vehicle 3               | 0.377                | Pass   | 0.722                | Pass   |
| Vehicle 4               | 0.036                | Fail   | 0.015                | Fail   |
| Vehicle 5               | 0.002                | Fail   | 0.013                | Fail   |
| Combined vehicles       | 0.002                | Fail   | 0.050                | Pass   |

<sup>a</sup>A dataset with P value above 0.05 is considered as evidence for the lognormal distribution of the dataset, indicating that the datasets “pass” the test for lognormality.

<sup>b</sup>Screenings were performed using five different vehicles and results were separated accordingly into five different datasets.

#### S4. Determination of emissions distributions and emission factors

In this study, we estimate emissions probability density functions (pdfs) that follow a lognormal distribution using a mathematical approach that has been used in previous publications (Zavala-Araiza et al., 2015, 2018; Alvarez et al., 2018; Robertson et al., 2020). These pdfs are then used to derive representative site-level emission Factors (EF) that consider the effect of the low probability but high-emission sites that describe skewed distributions.

Let  $x$  be the natural logarithm of CH<sub>4</sub> emissions (in kg h<sup>-1</sup>) measured at a site. Since  $x$  is normally distributed, the pdf of observing a single data point  $x$ , is given by:

$$p(x|\mu, \sigma) = \frac{1}{\sigma\sqrt{2\pi}} e^{-\frac{(x-\mu)^2}{2\sigma^2}} \quad (5)$$

Where  $\mu$  and  $\sigma$  denote the mean and the standard deviation of the log-transformed data. We define  $\Phi(x)$  as the cumulative standard normal:

$$\Phi(x) = \int_{-\infty}^x \frac{1}{\sqrt{2\pi}} e^{-\frac{\partial^2}{2}} d\partial \quad (6)$$

And:

$$\int_{-\infty}^x p(\partial|\mu, \sigma) d\partial = \Phi\left(\frac{x-\mu}{\sigma}\right) \quad (7)$$

The natural logarithm of the likelihood function, or log-likelihood function is:

$$l(\mu, \sigma) = S_o \ln \Phi \left( \frac{DL - \mu}{\sigma} \right) - S_r \ln \sigma - \sum_{i=1}^{S_r} \frac{(x_i - \mu)^2}{2\sigma^2} \quad (8)$$

where  $DL$  is the Detection Limit, or the lowest detectable emission rate, of each quantification method,  $S_o$  is the number of measurements at or below the detection limit and  $S_r$  is the number of measurements above the detection limit.

We use Maximum Likelihood Estimation (MLE) to derive the parameters  $\mu$  and  $\sigma$  by performing an optimisation routine which maximises Eq. 8. MLE is a popular method that allows us to use the observed data to estimate the parameters of the probability distribution that generated this observed sample. We also use a direct search algorithm to calculate 95 % confidence intervals (CI) by inverting the Likelihood Ratio Test, a statistical test used to compare the goodness of fit between two models. We can then use the maximum likelihood estimated parameters to derive a central, site-level emission factor on the arithmetic scale, EF, defined as:

$$EF = e^{\mu + \frac{1}{2}\sigma^2} \quad (9)$$

Emission distributions can be characterized following this approach for sufficiently large sample sizes (i.e., approximately >25 samples; Alvarez et al. 2018 ). Zavala-Araiza et al. (2015) provides an extensive description of this statistical approach as well as additional variations or constraints of this method.

This statistical estimator approach is our default method for the determination of emissions distributions and emission factors. In addition to the statistical estimator, we use alternative approaches to determine the whole basin emission factor by separating data from each measurement method (OTM-33A, GPM, TDM, MBA) into two regions, referred to as “east” and “west” parts of the production basin (see Fig. 1 in main text). In this approach, the non-detects were added based on the lowest measured value per method and per region (Table S3). In this approach, methods that have measured very low values do not need non-detects. A more detailed description and the results of this approach can be found in Section S7.

## S5. “Non-detects” and Detection Limit

To ensure that our emission factor estimates are as representative as possible of the emission distribution of the total population of oil wells in the studied regions, the implementation of the statistical estimator requires information about the detection limit of each method and the number of sites emitting at an emission rate below this detection limit, the so called “non-detects”. The original measurements below the detection limit of each method (if there are any) are replaced by a (typically larger) number of censored data based on the estimated fraction of non-detects (see below).

Korbeń et al. (2022) evaluated data from the screening vehicles to estimate the number of sites below the detection limit for the OTM-33A method. Using a minimum enhancement above background of 200 ppb for the application of the OTM-33A technique, they determined a fraction of 35 % of non-detects for the subset of oil wells. The detection limit of the OTM-33A has been discussed in previous studies. Brantley et al. (2014) determined the detection limit of OTM-33A method equal to 0.036 kg h<sup>-1</sup>. Robertson et al. (2020) performed a sensitivity analysis using different detection limits but since no significant effect on the results was found, they also determined the detection limit as 0.036 kg h<sup>-1</sup>. For the ROMEO measurements, Korbeń et al. (2022) determined the detection limit as 0.11 kg h<sup>-1</sup>, which is the lowest emission rate measured using OTM-33A in this study. We use this value for our analysis and apply it as well to the GPM

256 dataset because the OTM-33A and GPM measurements were partly carried out by the same  
 257 teams following a consistent site selection approach (Korbeń et al., 2022).

258 For the UAV-based measurements, for our reference statistical approach the detection limit  
 259 is set equal to the lowest quantified value of two UAV-based datasets, which is the same as for  
 260 the OTM-33A method,  $0.11 \text{ kg h}^{-1}$ . Since the lowest quantified value of these two measurements  
 261 methods is the same and they visited approximately the same regions, we also use the same  
 262 percentage of non-detects as the OTM-33A method, thus 35%. For the alternative statistical  
 263 approaches A3-A6 (See S7) the detection limit is also set to the lowest quantified value, but per  
 264 region, which is  $0.11$  and  $0.20 \text{ kg h}^{-1}$  for the regions “west” and “east”, respectively. We determine  
 265 the percentage of non-detects to be equal to 38 % for region “west”, and 55 % for region “east”.

266 For the TDM quantifications, the number of the BDL sites (see S1) can be directly used as  $S_0$   
 267 for the TDM quantifications. This leads to a fraction of 27 % for oil wells for the TDM method. For  
 268 the derivation of the detection limit, we use the average of the calculated upper limit emission  
 269 rates assigned to the sites with emissions BDL. This leads to a detection limit of  $0.07 \text{ kg h}^{-1}$ .  
 270 Roscioli et al. (2015) reported the detection limit of TDM equal to  $0.02 \text{ kg h}^{-1}$ . Because of  
 271 unfavourable meteorological conditions during the three-week campaign in Romania, in  
 272 particular low and unstable wind speed, it is reasonable that the detection limit is higher in our  
 273 study.

274 We can also use the screening dataset to obtain independent information about the number  
 275 of sites below the detection limit of our measurement methods. 217 oil wells had normalized  $\text{CH}_4$   
 276 enhancements lower than 2.2 ppm, accounting for 32 % of the total number of screened oil wells  
 277 that were assigned to the normalized enhancements. As mentioned above, the value of 2.2 ppm  
 278 is considered as the limit for OTM-33A (Korbeń et al., 2022). For a limit of 1.9 ppm, we get a  
 279 fraction of 30 %, whereas for a higher limit of 2.5 ppm, we get a fraction of 35 %. These  
 280 percentages are comparable to the value of 35 % that we used for the derivation of emission  
 281 factors (for OTM-33A, GPM and MBA), based on the results of Korbeń et al. (2022), and 27 % (for  
 282 TDM), based on the fraction of BDL values from the TDM team (Delre et al., 2022). An alternative  
 283 approach to determine the percentage of non-detects for each measurement method using the  
 284 screening data is described in section see S6.

285 The effect on the lognormal fit and the final EFs was further evaluated by testing several  
 286 different values for the detection limit and the fraction of non-detects (see S8). We find that by  
 287 decreasing the value of the detection limit or by increasing the fraction of non-detects, the  
 288 estimated EFs increase, due to the widening of the distribution towards the lower end. To avoid  
 289 overestimating the fraction of non-detects, and thus leading to an erroneously large estimate of  
 290 the EFs, we perform the calculations with a smaller fraction of non-detects. We consider that a  
 291 certain portion, specifically  $2/3$ , of the non-detects are zero-emitters, e.g., sites without any  
 292 emissions. This approach is referred to as our reference scenario (A1) and is discussed in the main  
 293 text.

294 Table S3 provides an overview of the different detection limits and percentages of non-detects  
 295 used for each statistical method A1-A4 that have been performed to evaluate the ROMEO oil well  
 296 measurements. Table S10 (section S7) provides an overview of the estimated parameters  $\mu$ ,  $\sigma$   
 297 and EF, and a description of these different statistical methods A1-A6.

298 Table S3. Summary of the different detection limits and percentages of non-detects used for each  
 299 different approach.

| Method | Ref [whole basin] | A3&A4 |
|--------|-------------------|-------|
|--------|-------------------|-------|



|         | A1                       |                    | A2                       |                    | East region              |                    | West region              |                    |
|---------|--------------------------|--------------------|--------------------------|--------------------|--------------------------|--------------------|--------------------------|--------------------|
|         | DL [kg h <sup>-1</sup> ] | S <sub>o</sub> [%] | DL [kg h <sup>-1</sup> ] | S <sub>o</sub> [%] | DL [kg h <sup>-1</sup> ] | S <sub>o</sub> [%] | DL [kg h <sup>-1</sup> ] | S <sub>o</sub> [%] |
| OTM-33A | 0.11                     | 12                 | 0.11                     | 35                 | 0.40                     | 70                 | 0.11                     | 39                 |
| GPM     | 0.11                     | 12                 | 0.11                     | 35                 | 1×10 <sup>-3</sup>       | -                  | 0.03                     | 12                 |
| TDM     | 0.07                     | 9                  | 0.07                     | 27                 | 1.2×10 <sup>-3</sup>     | -                  | 6.5×10 <sup>-3</sup>     | -                  |
| MBA     | 0.11                     | 12                 | 0.11                     | 35                 | 0.20                     | 55                 | 0.11                     | 38                 |

300 A1-Reference, see section S4, A2-Same as reference approach but with higher # of non-detects, A3-Per  
301 method & different # non detects, A4-Per region & different # non-detects, A5-Per method & no non-  
302 detects, A6-Per region & no non-detects (A5&A6 use the same DL as A3&A4 but zero S<sub>o</sub> and therefore not  
303 included separately in the above table).

304  
305  
306

## 306 S6. Alternative determination of non-detects from screening data

307 To derive an alternative estimate for the number of non-detects, we investigate the  
308 correlation between the CH<sub>4</sub> emission rate determined for the quantified sites and the maximum  
309 observed CH<sub>4</sub> mole fraction observed at the same site from the screening data. We expect that  
310 in general higher emission rates should correspond to higher mole fractions during the screening  
311 phase, but local meteorological conditions will strongly affect the correlation for individual  
312 points. Therefore, screenings are not sufficient for an emission quantification since they are  
313 short-term observations and not done under controlled and reproducible conditions. In addition,  
314 the direct comparison is hampered by the fact that the quantifications and screenings are  
315 performed at different times and emissions likely vary over time. Nevertheless, when visiting a  
316 lot of sites, the effects of these factors are expected to average out and we use the overall  
317 correlation for a statistical analysis. The obtained correlation based on 85 matching pairs has a  
318 slope of 0.0196 kg h<sup>-1</sup> / ppm and a correlation coefficient of R<sup>2</sup> = 0.53.

319 The slope determined from the correlation can be used to roughly estimate (on a statistical  
320 basis, not on an individual site basis) emission rates and a probability distribution for an  
321 additional set of 883 oil wells from the screening dataset. When we treat this distribution with  
322 our statistical estimator approach, we obtain mean and width of the distribution of as  $\mu = -1.81$   
323 and  $\sigma = 1.5$ . We then use this distribution to attain information about the non-detects (Table S4)  
324 for each method (MBA, OTM-33a, GPM, TDM). Defining DL as the lowest emission rate measured  
325 for each method and knowing the estimated  $\mu$  and  $\sigma$  parameters of the distribution through a z-  
326 score<sup>1</sup>, a percentage of corresponding non-detects was determined for each method by  
327 calculating the fraction of values less than that DL. Note that this does not mean that the used  
328 methods (MBA, OTM-33a, GPM, TDM) cannot quantify emissions below defined detection limit,  
329 only that they generally did not measure emissions below that threshold during the ROMEO  
330 campaign.

331 The investigated basin can also be divided into two regions, i.e., east and west (Fig. 1, main  
332 text) and the approach can be performed for the quantifications in both parts individually. Thus,  
333 Table S4 gives an overview of parameters together with non-detects for each method (MBA,  
334 OTM33a, GPM, TDM) for two different regions (E, W).

---

<sup>1</sup>  $z - score = \frac{\log(x_{min}) - \mu}{\sigma}$

335  
 336 Table S4. Overview of parameters for each method (MBA, OTM33a, GPM, TDM) for two different regions,  
 337 east (E) and west (W).

| Method  | Region | Nr. Sites | Min = DL [kg h <sup>-1</sup> ] | Max [kg h <sup>-1</sup> ] | S <sub>0</sub> [%] | S <sub>r</sub> [nr.] | Total [nr.] | μ      | Σ     |
|---------|--------|-----------|--------------------------------|---------------------------|--------------------|----------------------|-------------|--------|-------|
| OTM-33A | E      | 15        | 0.40                           | 7.7                       | 30 [70 %]          | 13                   | 43          | -2.06* | 2.42* |
| GPM     | E      | 63        | 6x10 <sup>-4</sup>             | 39                        | x [-]**            | 63                   | 63          | -0.21  | 2.57  |
| TDM     | E      | 19        | 12x10 <sup>-4</sup>            | 27                        | x [-]**            | 19                   | 19          | -0.13  | 2.40  |
| MBA     | E      | 14        | 0.20                           | 6.5                       | 16 [55 %]          | 13                   | 29          | -1.74* | 2.13* |
| OTM-33A | W      | 39        | 0.11                           | 73                        | 24 [39 %]          | 38                   | 62          | -1.05* | 2.54* |
| GPM     | W      | 7         | 0.03                           | 46                        | 1 [12 %]           | 6                    | 7           | -0.31* | 2.84* |
| TDM     | W      | 8         | 65x10 <sup>-4</sup>            | 1.5                       | x [-]**            | 8                    | 8           | -1.47  | 2.00  |
| MBA     | W      | 17        | 0.11                           | 18                        | 10 [38 %]          | 16                   | 26          | -1.19* | 2.43* |

338 \* μ and σ calculated using the statistical estimator

339 \*\* no non-detects were added due to very low quantified emissions

340 DL - detection limit, S<sub>0</sub> - number of measurements equal or below DL, S<sub>r</sub> - number of measurements above  
 341 DL

342

### 343 S7. Alternative up-scaling approaches

344 Using the alternative approach presented in S6 to determine the non-detects for each method  
 345 per region, we were able to upscale our emissions to (a) regional and (b) basin-scale. Upscaling  
 346 is based on the density of normal mixture<sup>1</sup>, using the existing function rnormMix from the R  
 347 package ‘EnvStats’. The 95 % CI was determined using the R package ‘boot’ for a non-parametric  
 348 bootstrap method (Canty and Ripley, 2021). The main differences between this approach and the  
 349 statistical estimator method are following:

- 350 (i) each measurement method dataset (OTM-33A, GPM, TDM, MBA) is split into two  
 351 regions (east/west),
- 352 (ii) the corresponding percentages of non-detects were added to each measurement  
 353 method dataset (OTM-33A, GPM, TDM, MBA) according to the lowest regional  
 354 measured value (Table S5).

355

356 The results of the regional analysis and selected groups of methods are presented in Table S5  
 357 and Fig. S1. Both regions have similar width of the distribution (Fig. S1), and relatively large 95 %  
 358 CI due to the small sample size and large variability of the CH<sub>4</sub> emission factor. Nevertheless, we  
 359 derive comparable estimates in both regions, with a difference of ~ 9 % between the central  
 360 estimates of 9.9 kg h<sup>-1</sup> site<sup>-1</sup> and 9.1 kg h<sup>-1</sup> site<sup>-1</sup>. When all quantifications from the eastern and  
 361 western region are combined, we get a central estimate of CH<sub>4</sub> emission level equal to 9.9 kgh<sup>-1</sup>  
 362 (7.2 - 14, 95 % CI).

363 Table S5. Overview of emission factors for the eastern and western part of the basin. Approach  
 364 referred to as A4.

<sup>1</sup>  $g(x, \mu_1, \sigma_1, \mu_2, \sigma_2) = (1 - p)f(x, \mu_1, \sigma_1) + pf(x, \mu_2, \sigma_2);$   
 μ - mean; σ - sd; p - mixing probability vector [0.5]

| Method        | Region      | $\mu$ | $\sigma$ | EF [ $\text{kg h}^{-1} \text{site}^{-1}$ ] | 95 % CI |
|---------------|-------------|-------|----------|--------------------------------------------|---------|
| MBA + OTM-33A | E           | -1.87 | 2.28     | 2.1                                        | 1.6–2.3 |
| GPM + TDM     | E           | -0.14 | 2.49     | 19                                         | 14–27   |
| TOTAL E       | E           | -0.96 | 2.55     | 9.9                                        | 7.2–14  |
| MBA + OTM-33A | W           | -1.09 | 2.49     | 7.5                                        | 5.5–10  |
| GPM + TDM     | W           | -0.87 | 2.53     | 10                                         | 7.0–15  |
| TOTAL W       | W           | -0.94 | 2.51     | 9.1                                        | 6.6–13  |
| <hr/>         |             |       |          |                                            |         |
| TOTAL         | Whole basin | -0.93 | 2.54     | 9.9                                        | 7.2–14  |

365

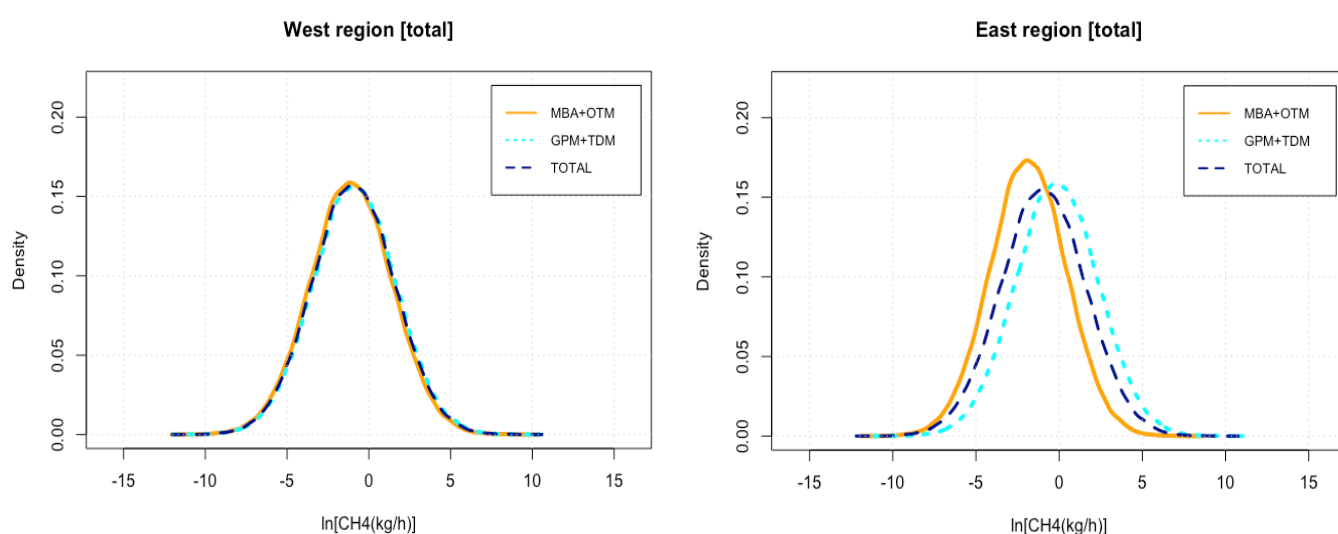

366

367

368

369

370

371

372

373

374

375

376

Figure S1. Fitted pdfs for the eastern (a) and western part of the basin (b). The dark blue dashed line presents the total distribution as a mixture of all four quantification methods (MBA, OTM, GPM, TDM) in the eastern and western part, respectively.

377

378

379

Table S6 and Fig. S2 show the results of another alternative statistical approach, where the quantifications are evaluated for the individual methods. The subset of sites evaluated with the GPM method leads to the highest EFs, and the sites evaluated with the MBA to the lowest EFs. The overall basin-wide evaluation of the total set of quantifications again returns an emission factor close to the reference approach,  $9.6 \text{ kg h}^{-1} \text{site}^{-1}$ .

Table S6. Summary of the total  $\text{CH}_4$  basin emission factors upscaled from the four different measurement methods (OTM-33A, GPM, TDM, MBA). Approach referred to as A3.

| Method  | $\mu$ | $\sigma$ | EF [ $\text{kg h}^{-1} \text{site}^{-1}$ ] | 95 % CI |
|---------|-------|----------|--------------------------------------------|---------|
| OTM-33A | -1.51 | 2.54     | 5.6                                        | 4.0–7.8 |
| GPM     | -0.23 | 2.71     | 31                                         | 22–46   |
| TDM     | -0.78 | 2.31     | 6.5                                        | 4.9–8.8 |

|       |       |      |     |         |
|-------|-------|------|-----|---------|
| MBA   | -1.43 | 2.31 | 3.4 | 2.6–4.6 |
| TOTAL | -0.96 | 2.54 | 9.6 | 7.0–14  |

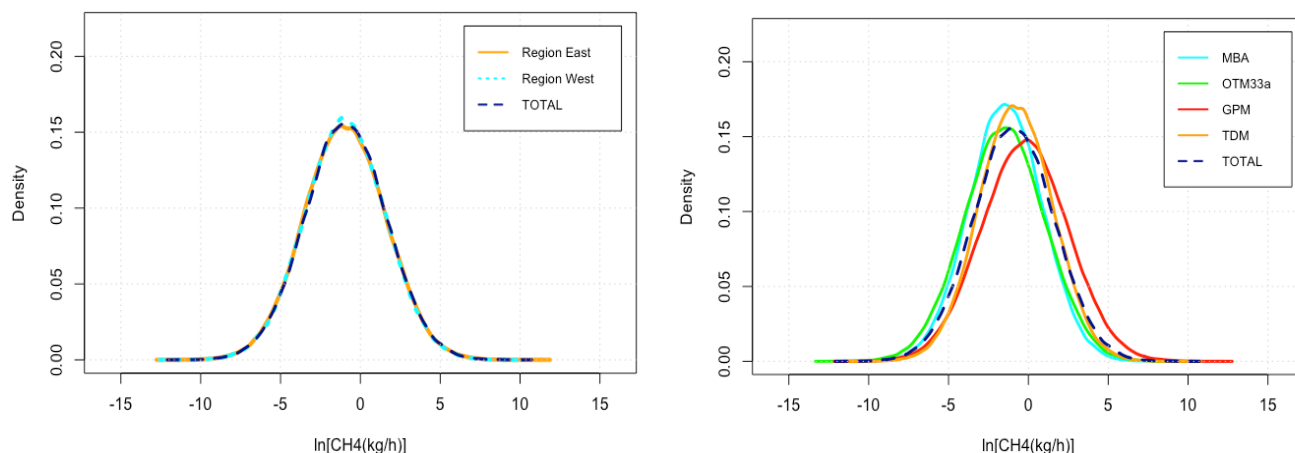

380  
381  
382 Figure S2. Fitted pdfs derived from the alternative upscaling approaches: per region (left) and  
383 measurement method (right). The dark blue dashed line shows the total basin distribution.

384 Finally, we add a separate mode of zero emitters also for these alternative statistical  
385 approaches. This means that instead of adding non-detects to the evaluation with the statistical  
386 estimator, we treat the fraction of sites with emission rates BDL as sites that do not emit any CH<sub>4</sub>.  
387 This is again performed for the entire population of quantifications, for the different regions and  
388 the different methods. Results are shown in Table S7 and S8 and Fig. S3.

389 Table S7. Overview of the total CH<sub>4</sub> basin emission factors per region (east, west) upscaled using the zero-  
390 mode approach, referred to as A6.

| Region | $\mu$               | $\sigma$ | EF [kg h <sup>-1</sup> site <sup>-1</sup> ] | 95 % CI |
|--------|---------------------|----------|---------------------------------------------|---------|
| East   | -0.14               | 1.92     | 7.3                                         | 5.9–9.0 |
| West   | -3×10 <sup>-4</sup> | 1.97     | 7.0                                         | 5.7–8.7 |
| TOTAL  | -0.09               | 1.95     | 7.3                                         | 5.9–9.1 |

391  
392 Table S8. Summary of the total CH<sub>4</sub> basin emission factors per method upscaled using the zero-mode  
393 approach, referred to as A5.

| Method  | $\mu$ | $\sigma$ | EF [kg h <sup>-1</sup> site <sup>-1</sup> ] | 95 % CI |
|---------|-------|----------|---------------------------------------------|---------|
| OTM-33A | 0.65  | 1.14     | 3.7                                         | 2.4–5.8 |
| GPM     | -0.15 | 2.56     | 22                                          | 8.8–64  |
| TDM     | -0.52 | 2.38     | 9.8                                         | 2.6–46  |
| MBA     | 0.21  | 1.22     | 2.6                                         | 1.6–4.3 |
| TOTAL   | 0.09  | 1.98     | 7.8                                         | 6.2–10  |

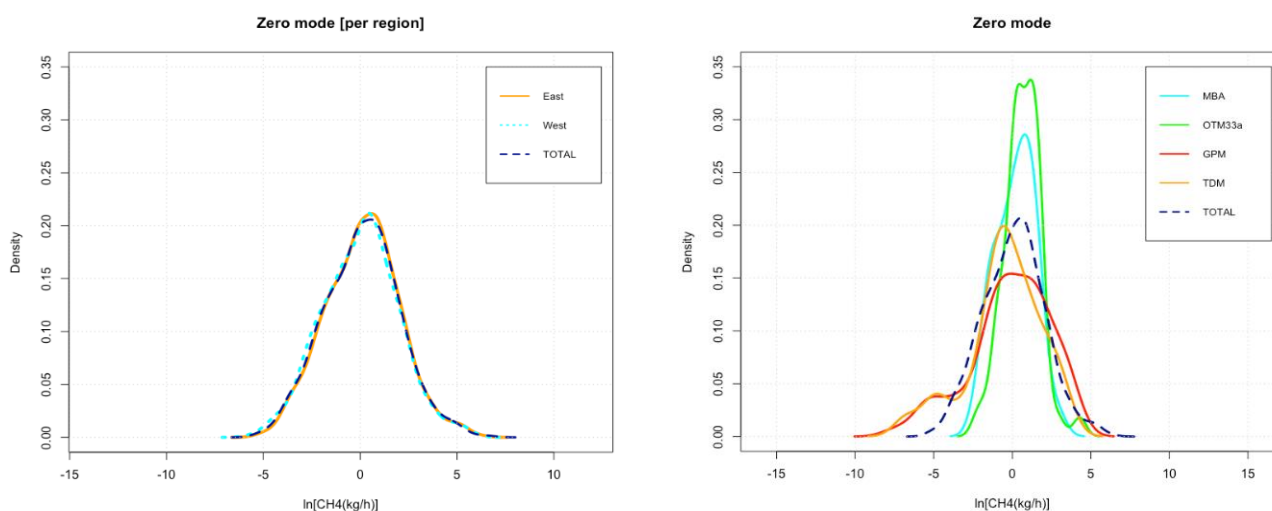

395  
 396  
 397 Figure S3. Fitted pdfs derived from the zero-mode upscaling method: per region (left) and measurement  
 398 method (right). The dark blue dashed line shows the total basin distribution as mixture.

399 The final additional estimate of the total CH<sub>4</sub> basin EFs is calculated using the reference  
 400 statistical approach but with a higher fraction of non-detects. This modification of our reference  
 401 approach uses the original fraction of non-detects discussed in section S5 without assuming a  
 402 separate mode of zero emitters. Table S9 summarizes the key parameters and derived EFs and  
 403 Fig. S4 shows the pdfs generated from this modification of the statistical estimator.

404 Table S9. Summary of parameters from the statistical estimator using a higher fraction of non-detects  
 405 compared to the reference scenario. Approach referred to as A2.

| Method  | D <sub>L</sub><br>[kg h <sup>-1</sup> ] | S <sub>r</sub> | S <sub>o</sub> [% of non-<br>detects] | μ     | σ    | EF<br>[kg h <sup>-1</sup> site <sup>-1</sup> ] | 95 % CI |
|---------|-----------------------------------------|----------------|---------------------------------------|-------|------|------------------------------------------------|---------|
| OTM-33A | 0.11                                    | 53             | 29 [35 %]                             | -0.85 | 2.38 | 7.3                                            | 2.2–30  |
| GPM     | 0.11                                    | 57             | 31 [35 %]                             | -1.00 | 2.70 | 14                                             | 3.4–74  |
| TDM     | 0.07                                    | 21             | 8 [27 %]                              | -0.97 | 2.46 | 7.9                                            | 1.2–85  |
| MBA     | 0.11                                    | 31             | 17 [35 %]                             | -1.07 | 2.17 | 3.7                                            | 1.0–17  |
| TOTAL   | -                                       | -              | -                                     | -0.98 | 2.49 | 8.3                                            | 3.8–19  |

406 D<sub>L</sub> is the detection limit of each measurement method, S<sub>r</sub> is the number of measurements above the  
 407 detection limit, S<sub>o</sub> is the number of measurements at or below the detection limit (included as censored  
 408 data), EF is the emission factor estimated as  $EF = e^{\mu + \frac{1}{2}\sigma^2}$ , TOTAL presents the results of the statistical  
 409 estimator considering all four measurement methods.

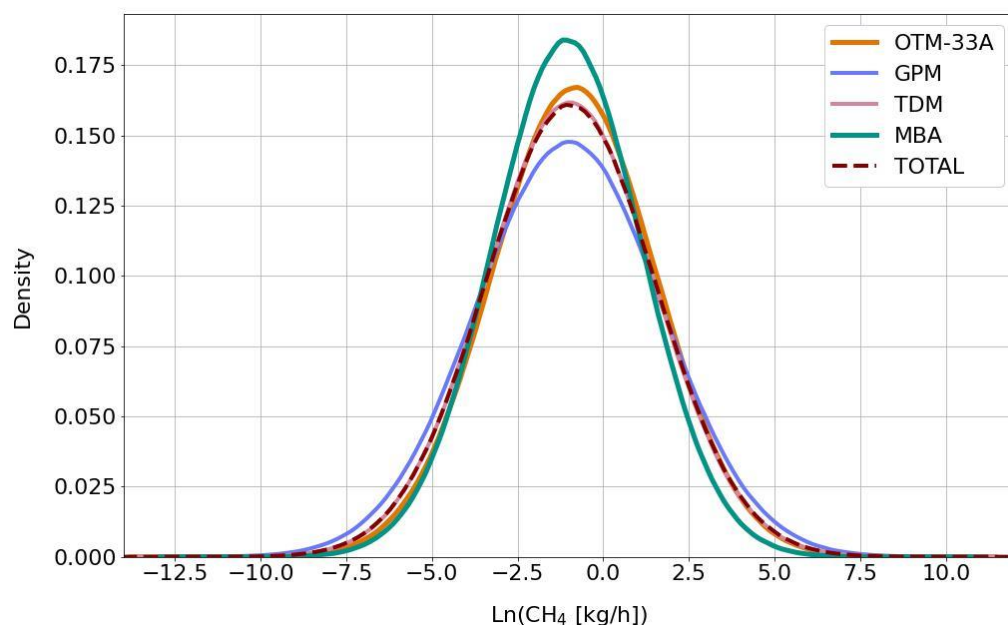

410

411 Figure S4. Fitted pdfs of the statistical estimator for each measurement method using a higher fraction  
 412 of non-detects compared to the reference scenario.

413 Table S10 and Fig. S5 provide an overview of the different statistical upscaling approaches that  
 414 have been performed to evaluate the ROMEO oil well measurements. All estimates agree within  
 415 the 95 % confidence intervals. Even the lower ends of all individual approaches for oil wells in the  
 416 Southern part of Romania from one operator only (still the biggest operator) lead to estimates  
 417 of the annual emission rate that are larger than the emissions reported by Romania to the  
 418 UNFCCC for all emissions from oil and gas production, see main text.

419 Table S10. Different upscaling approaches used to determine the total CH<sub>4</sub> basin emission factors for the  
 420 ROMEO study.

| Approach              | Description                          | EF [kg h <sup>-1</sup> site <sup>-1</sup> ] | 95 % CI |
|-----------------------|--------------------------------------|---------------------------------------------|---------|
| A1 (Ref) <sup>a</sup> | Reference scenario                   | 5.4                                         | 3.6–8.4 |
| A2 <sup>a</sup>       | Higher # of non-detects              | 8.3                                         | 3.8–19  |
| A3 <sup>b</sup>       | Per method & different # non detects | 9.6                                         | 7.0–14  |
| A4 <sup>c</sup>       | Per region & different # non-detects | 9.9                                         | 7.2–14  |
| A2 <sup>b</sup>       | Per method & no non-detects          | 7.8                                         | 6.2–10  |
| A6 <sup>c</sup>       | Per region & no non-detects          | 7.3                                         | 5.9–9.1 |

421 <sup>a</sup>Overall EFs calculated using the statistical estimator, see S4

422 <sup>b</sup>Overall EFs calculated by statistically combining the EFs from four methods, see S7

423 <sup>c</sup>Overall EFs calculated by statistically combining the EFs from two regions, see S7

424

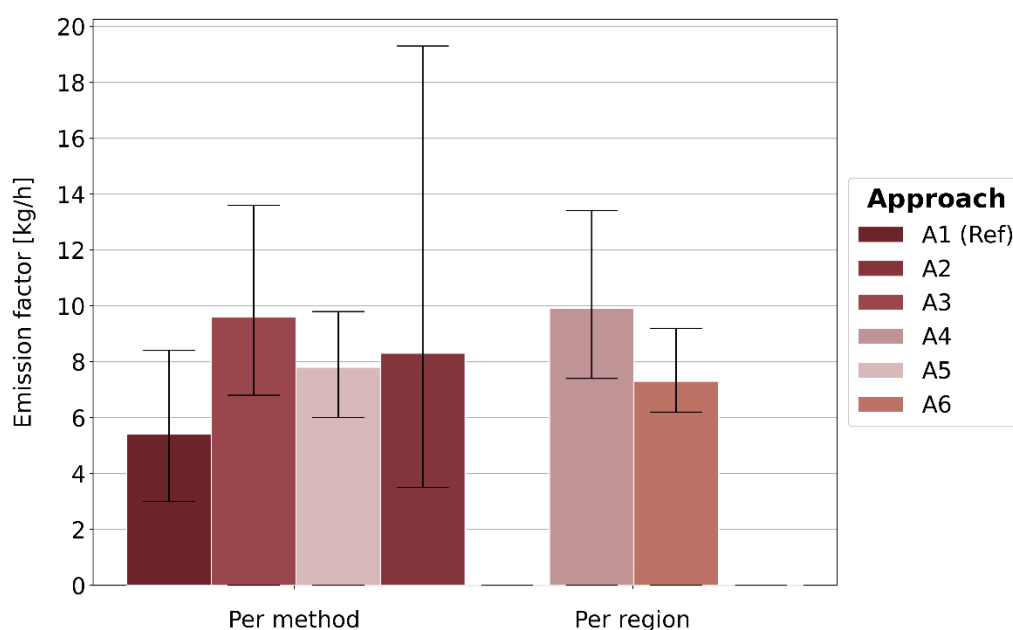

425 Figure S5. Overview of the CH<sub>4</sub> emission factor calculated from the ROMEO quantifications using the  
 426 different statistical approaches described above. The error bars represent the 95 % CI of estimated  
 427 emission factors. The numerical values are reported in Table S9. The approaches differ mainly in the  
 428 fraction of sites BDL added to the evaluation and the DL of each method. Approaches A5 and A6 do not  
 429 include any non-detects, but a separate mode of non-emitters.  
 430

### 431 S8. Sensitivity analysis of the statistical estimator

432 The results of the statistical estimator depend strongly on two parameters, the detection limit  
 433 of the measurement method and the number of sites below this detection limit, i.e., the non-  
 434 detects. We tested the sensitivity of the lognormal fits by running the statistical estimator for  
 435 three different values for both the detection limit and the fraction of non-detects. We use the  
 436 subset of oil wells from the OTM-33A method for the sensitivity analysis. Table S11 provides the  
 437 summary of the parameters and Fig. S6 presents the fitted pdfs derived from the statistical  
 438 estimator. By decreasing the value of the detection limit or by increasing the fraction of non-  
 439 detects, the estimated EFs increase, due to the widening of the distribution towards the lower  
 440 end. This behaviour is more prominent and results in very large EF estimates when the detection  
 441 limit is very low. The choice of the detection limit does not affect the high end of the distribution  
 442 substantially, and the choice of the percentage of non-detects has an even smaller impact. These  
 443 findings underscore the sensitivity of the statistical estimator to the low end of the distribution  
 444 and highlight the need for thorough investigation when choosing the values of these two  
 445 parameters.

446 Table S11. Summary of parameters from the statistical estimator calculated using different values for the  
 447 detection limit and for the fraction of non-detects.

| Parameter | DL [kg h <sup>-1</sup> ] | S <sub>r</sub> | S <sub>o</sub> [%] | μ | σ | EF [kg h <sup>-1</sup> site <sup>-1</sup> ] | 95 % CI |
|-----------|--------------------------|----------------|--------------------|---|---|---------------------------------------------|---------|
|-----------|--------------------------|----------------|--------------------|---|---|---------------------------------------------|---------|

|                  |       |    |          |       |      |      |           |
|------------------|-------|----|----------|-------|------|------|-----------|
| Detection limit  | 0.036 | 54 | 29 [35%] | -1.39 | 3.06 | 27.2 | 4.4 – 235 |
|                  | 0.11  | 53 | 29 [35%] | -0.85 | 2.38 | 7.3  | 2.2 – 30  |
|                  | 0.2   | 52 | 28 [35%] | -0.52 | 2.01 | 4.5  | 1.8 – 13  |
| % of non-detects | 0.11  | 53 | 18 [25%] | -0.31 | 2.03 | 5.7  | 2.3 – 16  |
|                  | 0.11  | 53 | 29 [35%] | -0.85 | 2.38 | 7.3  | 2.2 – 30  |
|                  | 0.11  | 53 | 43 [45%] | -1.47 | 2.73 | 9.7  | 2.1 – 57  |

448 DL is the detection limit of each measurement method,  $S_r$  is the number of measurements above the DL,  $S_o$   
449 is the number of measurements at or below the DL (included as censored data), EF is the emission factor  
450 estimated as  $EF = e^{\mu + \frac{1}{2}\sigma^2}$

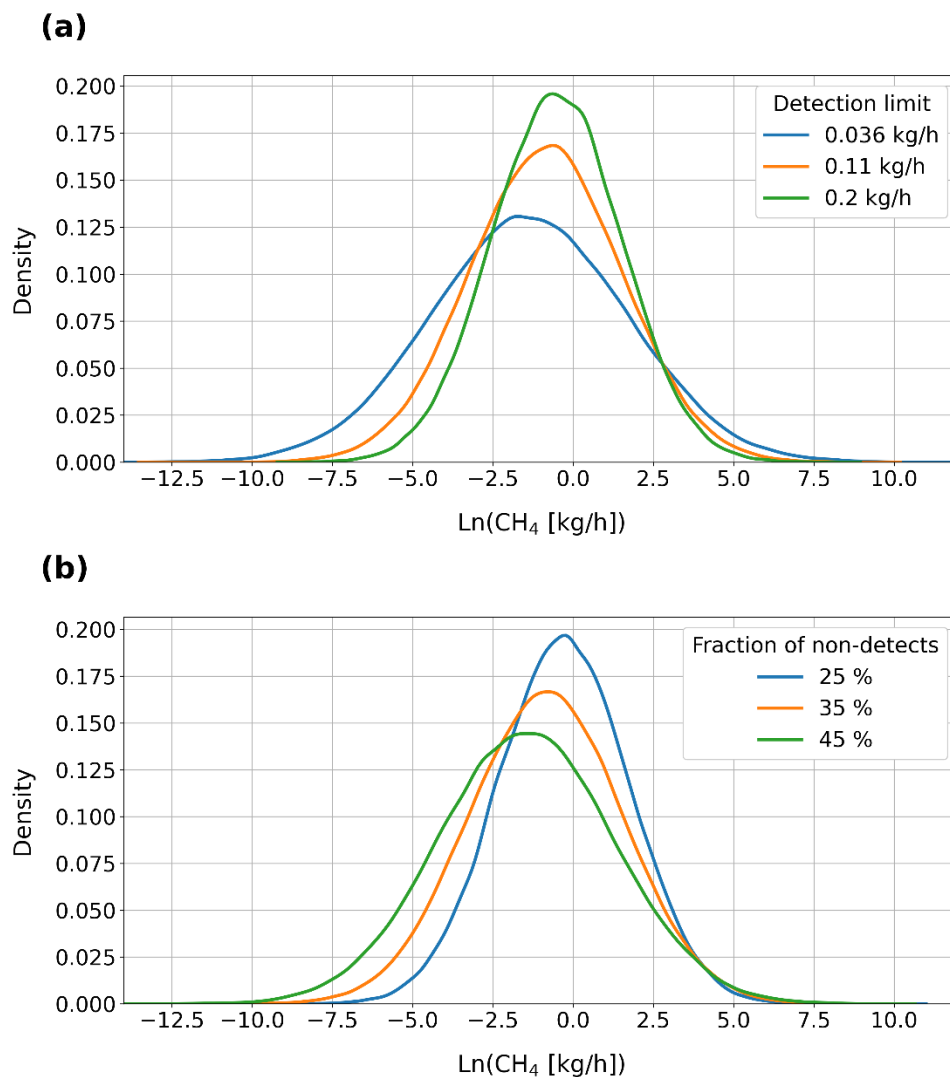

451  
452 Figure S6. Probability density functions derived from the statistical estimator calculated using different  
453 values for the detection limit (top) and number of non-detects (bottom).



454 **S9. Histograms and fitted pdfs under the statistical estimator for each**  
455 **measurement method used**

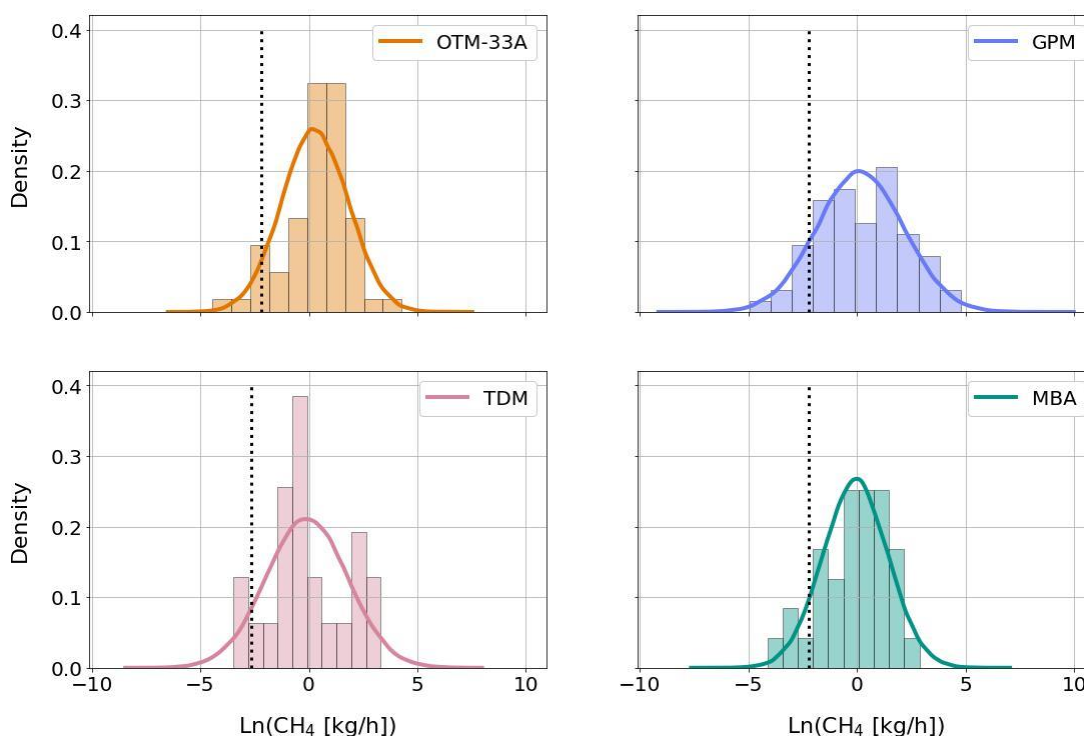

456  
457 Figure S7. Histograms and fitted pdfs under the statistical estimator for each measurement method used  
458 for the reference scenario. Vertical lines indicate the detection limit of each method. Values below these  
459 detection limits are the censored data chosen randomly between 0 kg h<sup>-1</sup> and each method's detection  
460 limit and added to the lower end of the distributions to include the non-detects as described in sections  
461 S4 and S5.

462  
463

**S10. Semi-quantitative evaluation of screening data**

464 A simplified Gaussian plume algorithm was applied to the screening data from all vehicles to  
465 locate the sources and determine normalized CH<sub>4</sub> enhancements. When a CH<sub>4</sub> enhancement was  
466 detected, the algorithm looked for registered O&G production sites within a radius of 100 m from  
467 the maximum CH<sub>4</sub> mole fraction observed and assigned the emission to this particular site.  
468 Gaussian peaks were fitted to the observed data and scaled to 1 m width by conserving the shape  
469 of the Gaussian function. This was done because sites were screened from a variety of distances  
470 and the maximum signal is not representative for the actual emissions. Scaling the peaks to a  
471 common width, which effectively means common distance if the meteorological conditions are  
472 similar, allowed to compare normalized CH<sub>4</sub> enhancements of all plumes. Histograms of the  
473 normalized CH<sub>4</sub> enhancements from each vehicle performing the screenings and the combination  
474 of their datasets are shown in Fig. S8.

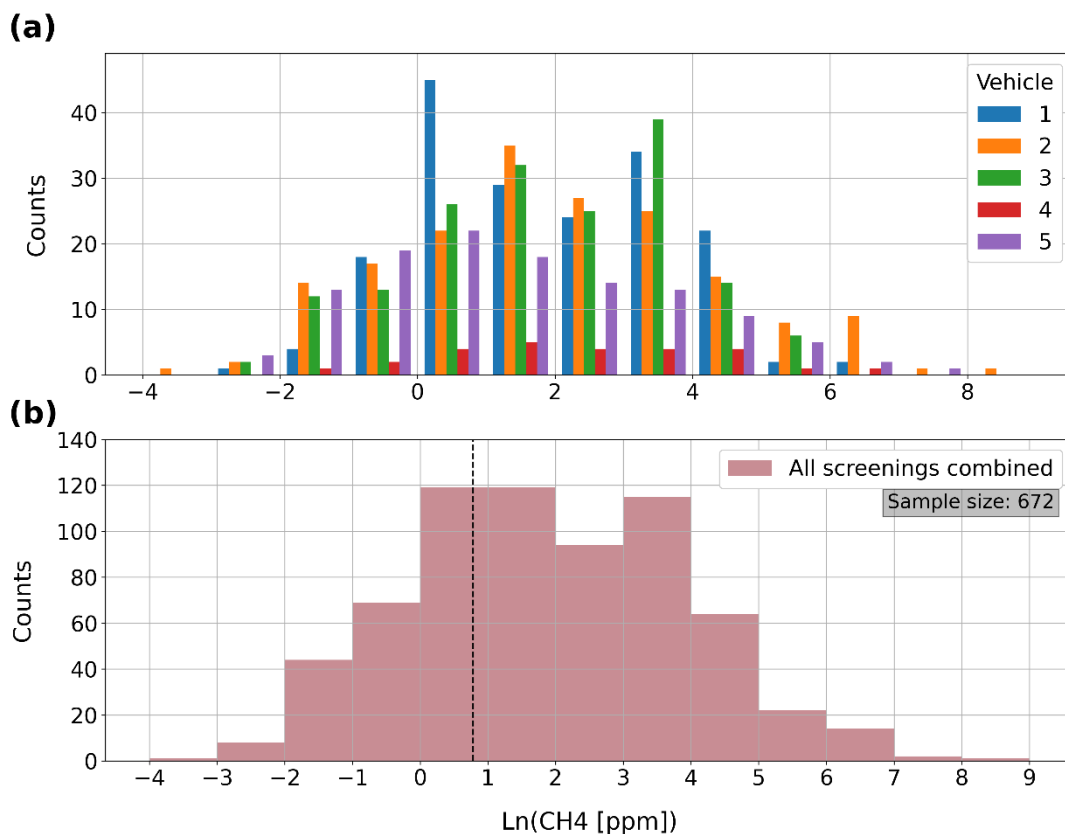

475

476 Figure S8. Frequency distribution of normalized CH<sub>4</sub> enhancements for oil wells from a) different  
 477 screening vehicles, b) the combination of datasets from the five screenings vehicles. The black dashed  
 478 vertical line in the lower graph indicates the detection limit of 2.2 ppm used for the OTM-33A dataset.  
 479

480 Table S12 shows the number of successfully normalized CH<sub>4</sub> enhancements from the  
 481 screening, and parameters  $\mu$  and  $\sigma$  derived from the statistical estimator using the normalized  
 482 CH<sub>4</sub> enhancements from each vehicle performing the screenings and the combination of their  
 483 datasets. When we fit the screening datasets to lognormal distributions, the estimated values  
 484 for the width of the distributions,  $\sigma$ , range between 1.8 and 2.3 in logarithmic scale, with a total  
 485 value of 2.0. Here, we assume that the emissions distribution for the screenings is complete,  
 486 i.e., we do not add measurements below the detection limit. For the quantifications using the  
 487 Reference scenario and including a small fraction of 9-12 % of non-detects to the distributions,  
 488 the values for the parameter  $\sigma$  range between 1.5 and 2.0, with a total value of 1.8. We find that  
 489 the estimates for the width of the distributions converge with the quantifications showing  
 490 slightly narrower distributions compared to the screenings. However, we note that the  
 491 estimated parameters under the statistical estimator may not accurately characterize the  
 492 screening distributions since not all screening datasets passed the statistical tests for  
 493 lognormality (see S3). Another reason for this small discrepancy could be the effect of the  
 494 fraction of non-detects to the width of the distribution. As discussed in Section S8, the width of  
 495 the lognormal fit depends on the choice of the fraction of non-detects and the detection limit.  
 496

497 Table S12. Overview of the number of normalized CH<sub>4</sub> enhancements, and parameters  $\mu$  and  $\sigma$  derived  
 498 from the statistical estimator using the normalized CH<sub>4</sub> enhancements per vehicle used for the  
 499 screenings.

| Vehicle <sup>a</sup> | # of Normalized CH <sub>4</sub> Enhancements | $\mu$ | $\sigma$ |
|----------------------|----------------------------------------------|-------|----------|
| 1                    | 181                                          | 2.0   | 1.8      |
| 2                    | 26                                           | 2.3   | 1.9      |
| 3                    | 177                                          | 2.1   | 2.3      |
| 4                    | 169                                          | 1.9   | 1.8      |
| 5                    | 119                                          | 1.4   | 2.2      |
| Total                | 672                                          | 1.9   | 2.0      |

<sup>a</sup>Screenings were performed using five different cars and results were separated into five different datasets.

500  
501  
502  
503  
504

### S11. Component scale measurements

505 Optical Gas Imaging (OGI, (Lyman et al., 2019)) was used to locate CH<sub>4</sub> sources on the  
506 component scale. After the detection and location of leaks with OGI, CH<sub>4</sub> emissions from  
507 accessible leaks were measured with a Hi-Flow Sampler (HFS, (Bacharach, 2015)). The HFS is a  
508 portable, battery-operated instrument used to determine the rate of gas leakage from individual  
509 components in the O&G infrastructure. The component is enclosed in a bag and the gas emitted  
510 from the component as well as a certain amount of surrounding air is pumped at high flow rate  
511 to a CH<sub>4</sub> analyzer. The gas leak rate of the component can then be calculated using the flow rate  
512 of the sampling stream and the gas mole fraction within that stream.

513 A total of 231 individual leaks were identified with the OGI camera. Because of limited site  
514 access, the emission rates of only 62 leaking components were measured using the HFS method.  
515 The majority of those, namely 33 leaks, were from two screened gas compressor stations with  
516 high number of emission points (see main text) and their emission rates ranged between 0.02 kg  
517 h<sup>-1</sup> to 1.6 kg h<sup>-1</sup> per leak. From oil wells, we could only measure leak rates from 14 components  
518 using the HFS method, yielding emission rate estimates between 0.1 and 6.5 kg h<sup>-1</sup> per leak. We  
519 note that a site can have several leaking components, which may not all be quantified, resulting  
520 in an underestimate of site-level emissions when only the quantified components are considered.

521  
522

Tab. x. Overview of the sites screened with infrared camera.

| Site Description              | # of emitting sites | # of emitting sites | # of identified leaks | # of quantified leaks | Range of CH <sub>4</sub> emission rates [kg h <sup>-1</sup> leak <sup>-1</sup> ] |
|-------------------------------|---------------------|---------------------|-----------------------|-----------------------|----------------------------------------------------------------------------------|
| Oil wells                     | 155                 | 74                  | 86                    | 14                    | 0.09 - 6.5                                                                       |
| Gas wells                     | 6                   | 3                   | 3                     | 3                     | 0.07 - 0.2                                                                       |
| Oil parks                     | 5                   | 5                   | 28                    | 7                     | 0.21 - 6.5                                                                       |
| Gas compressor stations       | 2                   | 2                   | 85                    | 33                    | 0.02 - 1.6                                                                       |
| Other Facilities <sup>a</sup> | 13                  | 6                   | 30                    | 5                     | 0.14 - 0.6                                                                       |
| Total                         | 181                 | 89                  | 231                   | 62                    | 0.07 - 6.5                                                                       |

523

<sup>a</sup>"Other facilities" include oil production batteries, disposal injection wells, oil deposits, random

524 locations and sites mentioned as "other facilities" in the data provided by the O&G production  
 525 operators.

526

## 527 **S12. Comparison with CH<sub>4</sub> emissions reported from other studies**

528 Table S13. Summary of estimated parameters derived from the statistical estimator for each  
 529 of the production regions used in our comparison.

| Dataset                               | $\mu$ | $\sigma$ | EF [kg h <sup>-1</sup><br>site <sup>-1</sup> ] | Gini<br>coefficient <sup>a</sup> | Reference                      |
|---------------------------------------|-------|----------|------------------------------------------------|----------------------------------|--------------------------------|
| Denver - Julesburg<br>(Colorado, US)  | -0.62 | 1.3      | 1.2                                            | 0.63                             | Robertson et<br>al. (2017)     |
| Barnett Shale (Texas,<br>US)          | -1.8  | 2.2      | 1.8                                            | 0.88                             | Zavala-Araiza<br>et al. (2015) |
| Red Deer (Alberta,<br>Canada)         | -0.31 | 1.5      | 2.2                                            | 0.70                             | Zavala-Araiza<br>et al. (2018) |
| Upper Green River (US)                | 0.32  | 1.0      | 2.4                                            | 0.53                             | Robertson et<br>al. (2017)     |
| Fayetteville (Arkansas,<br>US)        | -2.1  | 2.5      | 2.5                                            | 0.92                             | Robertson et<br>al. (2017)     |
| Uintah (Wyoming, US)                  | 0.17  | 1.3      | 2.7                                            | 0.63                             | Robertson et<br>al. (2017)     |
| Romania (Europe)                      | 0.12  | 1.8      | 5.4                                            | 0.79                             | This study                     |
| Marcellus (US)                        | 0.39  | 1.8      | 7.3                                            | 0.79                             | Omara et al.<br>(2016)         |
| Permian (Texas, New<br>Mexico, US)    | 1.5   | 1.1      | 8.2                                            | 0.56                             | Robertson et<br>al. (2020)     |
| Compressor stations<br>(national, US) | 3.1   | 1.5      | 64                                             | 0.71                             | Zavala-Araiza<br>et al. (2015) |
| Processing plants<br>(national US)    | 4.4   | 1.3      | 190                                            | 0.64                             | Zavala-Araiza<br>et al. (2015) |

530 <sup>a</sup>The Gini coefficient is a measure of statistical dispersion used to estimate the inequality among values of  
 531 a frequency distribution. A Gini coefficient of 0 represents complete equality, whereas a Gini coefficient  
 532 close to one expresses the maximum inequality among values where a few sites have a highly  
 533 disproportionate contribution to total emissions.

534

## 535 **S13. Production and age characteristics of surveyed oil wells**

536 To assess how representative the measured sites were in comparison to the characteristics of  
 537 the total population of sites in Romania and to determine possible differences between the  
 538 characteristics of sites measured with different quantification methods, we investigated the  
 539 relation of emission rate with age, oil and gas production provided by the operator. For the  
 540 majority of oil wells visited, the operator reported zero gas production or no gas production in  
 541 2019. For the oil wells which report a non-zero value for gas production, we calculate the average  
 542 gas production per site. We use the reported spud dates from the operators to determine the  
 543 number of years that a particular equipment has been in operation. This analysis was performed  
 544 for both the component and the facility scale measurements.

545 A summary of the characteristics for the measured oil wells and for the total population of oil  
 546 wells in Romania is shown in Table S14. The distribution for average site age shows little  
 547 variability across the different methods, between 28 years for the sites quantified with OTM-33A  
 548 and 34 years for TDM. The average age of the complete population is 37 years, so the sites  
 549 targeted during ROMEO were slightly younger than the average age of the total population.

550 The diversity of the sampled oil wells is more prominent in terms of production characteristics,  
 551 and higher than the total population average of 32 tons. Among all measurement methods, TDM  
 552 sites had the lowest average oil production of 43 tons per year, followed closely by MBA with 47  
 553 tons per year. GPM had the highest production of 77 tons of oil per year, more than double the  
 554 country average value. For the gas production, around 50 % of the sampled oil wells with OTM-  
 555 33A, GPM and MBA report zero gas production or had no gas production in 2019, for the TDM  
 556 this value is 60 %. These percentages are comparable to the 52 % of the total population of oil  
 557 wells in Romania. For the sites which report a non-zero value for gas production, TDM was  
 558 deployed at sites with the highest average production of around 106,000 scm of natural gas per  
 559 year, whereas for GPM it was 12,000 scm per year. The total population average is 27,400 scm.  
 560 In summary, oil wells sampled during ROMEO have higher oil production than the total  
 561 population. In terms of gas production, OTM-33A measurements were representative for the  
 562 total population of oil wells. TDM and MBA leaned towards the high, whereas GPM towards the  
 563 low end of the spectrum.

564 Table S14. Summary of characteristics (average production and age) from sampled oil wells based on the  
 565 measurement method used, and from the total population of oil wells in Romania.

| Characteristics                       | OTM-33A | GPM | TDM | MBA | Total population |
|---------------------------------------|---------|-----|-----|-----|------------------|
| Age [years]                           | 28      | 29  | 34  | 30  | 37               |
| Gas production [ $10^3$ scm per year] | 26      | 12  | 106 | 49  | 27               |
| Zero gas production [% of sites]      | 49      | 51  | 60  | 53  | 52               |
| Oil production [tons per year]        | 61      | 77  | 43  | 47  | 32               |

566 Similarly, a summary of the characteristics from the screened oil wells and from the total  
 567 population of oil wells in Romania is shown in Table S15. No significant differences were found  
 568 between emitting and non-emitting sites. For the gas production, approximately 70 % of emitting  
 569 and 82 % of non-emitting oil wells visited report zero gas production or had no gas production in  
 570 2019. These percentages are higher than the average percentage of the total population of oil  
 571 wells in the country. Emitting oil wells had an average age of 36 years, average gas production of  
 572 9,500 scm per year and average oil production of 48 tons per year. We found similar range of  
 573 values for non-emitting oil wells. Overall, the sites visited were representative of the total  
 574 population of sites in the country in terms of age, with a slight focus on newer sites. However,  
 575 measurements leaned more towards the high oil, but very low gas producing end of the  
 576 spectrum.  
 577

578 Table S15. Summary of characteristics (average production and age) from screened oil wells and from the  
 579 total population of oil wells in Romania.

| Characteristics | Emitting oil wells | Non-emitting oil wells | Total population |
|-----------------|--------------------|------------------------|------------------|
|-----------------|--------------------|------------------------|------------------|

|                                       |     |     |    |
|---------------------------------------|-----|-----|----|
| Age [years]                           | 36  | 37  | 37 |
| Gas production [ $10^3$ scm per year] | 9.5 | 7.5 | 27 |
| Zero gas production [% of sites]      | 70  | 82  | 52 |
| Oil production [tons per year]        | 48  | 52  | 32 |

580

581

582

## S14. Complete quantified emissions dataset

583

Table S16. Emission dataset used in this study

| N  | Method | Site ID  | Region | Site Description | CH <sub>4</sub> emissions [kg h <sup>-1</sup> ] |
|----|--------|----------|--------|------------------|-------------------------------------------------|
| 1  | TDM    | 58       | C7     | Facility         | 106.767                                         |
| 2  | TDM    | 7        | C8     | Gas well         | 90.439                                          |
| 3  | TDM    | 1        | C6     | Gas well         | 66.806                                          |
| 4  | TDM    | 16       | C6     | Oil well         | 27.286                                          |
| 5  | TDM    | 45       | C6     | Facility         | 25.025                                          |
| 6  | TDM    | 67       | C5A    | Facility         | 22.518                                          |
| 7  | TDM    | 59       | C7     | Oil well         | 20.071                                          |
| 8  | TDM    | 12       | C7     | Gas manifold     | 18.732                                          |
| 9  | TDM    | 48       | C7     | Oil park         | 13.030                                          |
| 10 | TDM    | 15       | C6     | Oil well         | 11.559                                          |
| 11 | TDM    | 47       | C7     | Facility         | 10.692                                          |
| 12 | TDM    | 54       | C7     | Facility         | 9.990                                           |
| 13 | TDM    | 18       | C7     | Oil well         | 9.537                                           |
| 14 | TDM    | 70       | C5A    | Facility         | 8.345                                           |
| 15 | TDM    | 11       | C8     | Facility         | 8.313                                           |
| 16 | TDM    | 9        | C8     | Gas manifold     | 7.500                                           |
| 17 | TDM    | 13       | C7     | Oil park         | 7.118                                           |
| 18 | TDM    | 68       | C5A    | Oil park         | 6.442                                           |
| 19 | TDM    | 17       | C7     | Oil well         | 6.440                                           |
| 20 | TDM    | 66       | C6     | Oil park         | 6.111                                           |
| 21 | TDM    | 74       | C5A    | Facility         | 5.028                                           |
| 22 | TDM    | 5        | C8     | Gas manifold     | 4.431                                           |
| 23 | TDM    | 44       | C6     | Oil park         | 3.983                                           |
| 24 | TDM    | 51/52/53 | C7     | Oil well         | 8.275*                                          |
| 25 | TDM    | 2        | C6     | Oil well         | 2.580                                           |
| 26 | TDM    | 33       | C5A    | Oil well         | 1.463                                           |
| 27 | TDM    | 10       | C8     | Gas well         | 1.322                                           |
| 28 | TDM    | 14       | C7     | Oil well         | 1.281                                           |
| 29 | TDM    | 69       | C5A    | Facility         | 0.833                                           |
| 30 | TDM    | 32       | C5A    | Oil well         | 0.816                                           |
| 31 | TDM    | 38       | C5A    | Oil well         | 0.778                                           |
| 32 | TDM    | 6        | C8     | Gas well         | 0.616                                           |
| 33 | TDM    | 31       | C5A    | Oil well         | 0.568                                           |
| 34 | TDM    | 36       | C5A    | Oil well         | 0.542                                           |
| 35 | TDM    | 37       | C5A    | Oil well         | 0.495                                           |
| 36 | TDM    | 65       | C6     | Oil well         | 0.488                                           |

|    |         |     |     |              |        |
|----|---------|-----|-----|--------------|--------|
| 37 | TDM     | 42  | C7  | Oil well     | 0.443  |
| 38 | TDM     | 62  | C7  | Oil well     | 0.324  |
| 39 | TDM     | 43  | C7  | Oil well     | 0.289  |
| 40 | TDM     | 4   | C8  | Oil well     | 0.245  |
| 41 | TDM     | 46  | C6  | Oil park     | 0.192  |
| 42 | TDM     | 8   | C8  | Gas well     | 0.149  |
| 43 | TDM     | 60  | C7  | Facility     | 0.142  |
| 44 | TDM     | 3   | C7  | Oil well     | 0.134  |
| 45 | TDM     | 55  | C7  | Oil well     | 0.118  |
| 46 | TDM     | 41  | C7  | Gas well     | 0.075  |
| 47 | TDM     | 49  | C7  | Oil well     | 0.035  |
| 48 | TDM     | 40  | C5A | Oil well     | 0.009  |
| 49 | TDM     | 39  | C5A | Oil well     | 0.006  |
| 50 | TDM     | 75  | C7  | Oil well     | 0.001  |
| 51 | OTM-33A | 258 | 4   | Oil well     | 72.612 |
| 52 | OTM-33A | 279 | 8   | Oil park     | 33.660 |
| 53 | OTM-33A | 226 | 4   | Oil well     | 18.432 |
| 54 | OTM-33A | 239 | 6   | Gas well     | 15.408 |
| 55 | OTM-33A | 263 | 6   | Gas well     | 14.652 |
| 56 | OTM-33A | 250 | 5A  | Oil facility | 12.852 |
| 57 | OTM-33A | 251 | 5A  | Oil park     | 12.708 |
| 58 | OTM-33A | 274 | 5A  | Oil facility | 11.376 |
| 59 | OTM-33A | 286 | 6   | Oil well     | 7.668  |
| 60 | OTM-33A | 272 | 4   | Oil well     | 6.984  |
| 61 | OTM-33A | 224 | 5A  | Oil well     | 6.588  |
| 62 | OTM-33A | 277 | 8   | Unknown      | 6.444  |
| 63 | OTM-33A | 234 | 7   | Oil well     | 6.264  |
| 64 | OTM-33A | 281 | 6   | Oil well     | 6.084  |
| 65 | OTM-33A | 235 | 2   | Oil well     | 5.544  |
| 66 | OTM-33A | 241 | 5A  | Oil well     | 5.256  |
| 67 | OTM-33A | 222 | 2   | Oil well     | 5.112  |
| 68 | OTM-33A | 273 | 5A  | Oil facility | 4.932  |
| 69 | OTM-33A | 280 | 8   | Unknown      | 4.788  |
| 70 | OTM-33A | 232 | 5A  | Oil well     | 4.680  |
| 71 | OTM-33A | 240 | 5A  | Oil well     | 4.608  |
| 72 | OTM-33A | 285 | 6   | Oil well     | 4.392  |
| 73 | OTM-33A | 238 | 5A  | Oil well     | 4.140  |
| 74 | OTM-33A | 227 | 4   | Oil well     | 4.068  |
| 75 | OTM-33A | 248 | 2   | Oil well     | 3.564  |
| 76 | OTM-33A | 295 | 6   | Oil well     | 3.564  |
| 77 | OTM-33A | 266 | 5A  | Oil well     | 3.168  |
| 78 | OTM-33A | 249 | 5A  | Oil well     | 3.132  |
| 79 | OTM-33A | 291 | 7   | Oil well     | 3.024  |
| 80 | OTM-33A | 231 | 4   | Oil well     | 2.808  |
| 81 | OTM-33A | 267 | 4   | Oil well     | 2.736  |
| 82 | OTM-33A | 289 | 6   | Oil well     | 2.736  |
| 83 | OTM-33A | 228 | 4   | Oil well     | 2.664  |
| 84 | OTM-33A | 265 | 5A  | Oil well     | 2.520  |

|     |         |          |     |             |          |
|-----|---------|----------|-----|-------------|----------|
| 85  | OTM-33A | 229      | 5A  | Oil well    | 2.412    |
| 86  | OTM-33A | 223      | 5A  | Oil well    | 1.980    |
| 87  | OTM-33A | 247      | 5A  | Oil well    | 1.728    |
| 88  | OTM-33A | 252      | 7   | Gas well    | 1.728    |
| 89  | OTM-33A | 293      | 6   | Oil well    | 1.692    |
| 90  | OTM-33A | 287      | 6   | Oil well    | 1.512    |
| 91  | OTM-33A | 288      | 6   | Oil well    | 1.512    |
| 92  | OTM-33A | 242      | 2   | Oil well    | 1.476    |
| 93  | OTM-33A | 225      | 4   | Oil well    | 1.440    |
| 94  | OTM-33A | 259      | 4   | Oil well    | 1.368    |
| 95  | OTM-33A | 256      | 4   | Oil well    | 1.332    |
| 96  | OTM-33A | 268      | 5A  | Oil well    | 1.260    |
| 97  | OTM-33A | 233      | 5A  | Oil well    | 1.188    |
| 98  | OTM-33A | 294      | 6   | Oil well    | 1.188    |
| 99  | OTM-33A | 255      | 5A  | Oil well    | 1.044    |
| 100 | OTM-33A | 269      | 5A  | Oil well    | 1.044    |
| 101 | OTM-33A | 284      | 7   | Oil well    | 1.044    |
| 102 | OTM-33A | 221      | 2   | Gas well    | 1.008    |
| 103 | OTM-33A | 253      | 5A  | Oil well    | 0.972    |
| 104 | OTM-33A | 264      | 4   | Oil well    | 0.972    |
| 105 | OTM-33A | 296      | 6   | Oil park    | 0.936    |
| 106 | OTM-33A | 246      | 2   | Oil well    | 0.828    |
| 107 | OTM-33A | 290      | 6   | Unknown     | 0.828    |
| 108 | OTM-33A | 270      | 4   | Oil well    | 0.792    |
| 109 | OTM-33A | 236      | 6   | Gas well    | 0.612    |
| 110 | OTM-33A | 261      | 4   | Oil well    | 0.540    |
| 111 | OTM-33A | 244      | 2   | Gas well    | 0.504    |
| 112 | OTM-33A | 262      | 5A  | Oil well    | 0.504    |
| 113 | OTM-33A | 276      | 8   | Unknown     | 0.504    |
| 114 | OTM-33A | 230      | 2   | Gas well    | 0.432    |
| 115 | OTM-33A | 260      | 5A  | Oil well    | 0.432    |
| 116 | OTM-33A | 282      | 6   | Oil well    | 0.432    |
| 117 | OTM-33A | 297      | 6   | Oil well    | 0.396    |
| 118 | OTM-33A | 275      | 6   | Oil well    | 0.360    |
| 119 | OTM-33A | 245      | 2   | Gas well    | 0.324    |
| 120 | OTM-33A | 271      | 5A  | Oil well    | 0.324    |
| 121 | OTM-33A | 283      | 7   | Unknown     | 0.252    |
| 122 | OTM-33A | 243      | 2   | Gas well    | 0.180    |
| 123 | OTM-33A | 254      | 5A  | Oil well    | 0.180    |
| 124 | OTM-33A | 278      | 8   | Gas well    | 0.180    |
| 125 | OTM-33A | 292      | 7   | Unknown     | 0.180    |
| 126 | OTM-33A | 237      | 2   | Gas well    | 0.108    |
| 127 | OTM-33A | 257      | 4   | Oil well    | 0.108    |
| 128 | GPM     | 50       | C7  | Oil park    | 138.513  |
| 129 | GPM     | 217      | 7   | Oil deposit | 93.060   |
| 130 | GPM     | 64       | C6  | Facility    | 63.771   |
| 131 | GPM     | 71       | C5A | Oil well    | 46.069   |
| 132 | GPM     | 24/25/26 | C6  | Oil well    | 118.079* |



|     |          |     |     |                |        |
|-----|----------|-----|-----|----------------|--------|
| 133 | GPM      | 56  | C7  | Facility       | 36.660 |
| 134 | GPM      | 212 | 4   | Other facility | 31.176 |
| 135 | GPM      | 21  | C7  | Oil well       | 26.487 |
| 136 | GPM      | 201 | 4   | Oil well       | 25.920 |
| 137 | GPM      | 23  | C6  | Oil well       | 22.722 |
| 138 | GPM      | 220 | 5A  | Unknown        | 14.904 |
| 139 | GPM      | 57  | C7  | Facility       | 14.655 |
| 140 | GPM      | 202 | 7   | Oil well       | 14.220 |
| 141 | GPM      | 219 | 5A  | Gas compressor | 12.996 |
| 142 | GPM      | 22  | C6  | Oil well       | 12.522 |
| 143 | GPM      | 211 | 5A  | Oil park       | 11.952 |
| 144 | GPM      | 20  | C7  | Oil well       | 10.233 |
| 145 | GPM      | 72  | C5A | Facility       | 9.175  |
| 146 | GPM      | 19  | C7  | Oil well       | 6.649  |
| 147 | GPM      | 205 | 7   | Oil well       | 6.444  |
| 148 | GPM      | 61  | C7  | Facility       | 6.202  |
| 149 | GPM      | 73  | C5A | Facility       | 5.848  |
| 150 | GPM      | 213 | 5A  | Oil deposit    | 5.688  |
| 151 | GPM      | 28  | C6  | Oil well       | 4.970  |
| 152 | GPM      | 27  | C6  | Oil well       | 4.416  |
| 153 | GPM      | 63  | 0   | Facility       | 3.812  |
| 154 | GPM      | 30  | C6  | Oil well       | 3.705  |
| 155 | GPM      | 214 | 5A  | Gas compressor | 3.204  |
| 156 | GPM      | 216 | 7   | Oil deposit    | 2.484  |
| 157 | GPM      | 203 | 4   | Oil well       | 2.448  |
| 158 | GPM      | 215 | 6   | Oil park       | 1.872  |
| 159 | GPM      | 218 | 7   | Oil park       | 1.656  |
| 160 | GPM      | 206 | 6   | Gas well       | 1.476  |
| 161 | GPM      | 29  | C6  | Oil well       | 0.956  |
| 162 | GPM      | 34  | C5A | Oil well       | 0.731  |
| 163 | GPM      | 209 | 7   | Oil well       | 0.684  |
| 164 | GPM      | 210 | 7   | Oil well       | 0.648  |
| 165 | GPM      | 208 | 7   | Oil well       | 0.576  |
| 166 | GPM      | 204 | 4   | Oil well       | 0.540  |
| 167 | GPM      | 207 | 4   | Oil well       | 0.288  |
| 168 | GPM      | 35  | C5A | Oil well       | 0.034  |
| 169 | Estimate | 97  | C6  | Gas well       | 61.228 |
| 170 | Estimate | 81  | C8  | Gas well       | 33.910 |
| 171 | Estimate | 98  | C6  | Gas well       | 31.889 |
| 172 | Estimate | 86  | C8  | Oil well       | 22.946 |
| 173 | Estimate | 91  | C7  | Oil well       | 19.967 |
| 174 | Estimate | 89  | C8  | Gas well       | 15.297 |
| 175 | Estimate | 140 | C7  | Oil well       | 7.957  |
| 176 | Estimate | 136 | C7  | Oil well       | 6.879  |
| 177 | Estimate | 159 | C6  | Facility       | 5.348  |
| 178 | Estimate | 173 | C6  | Oil well       | 5.159  |
| 179 | Estimate | 78  | C7  | Oil well       | 4.761  |
| 180 | Estimate | 137 | C7  | Facility       | 4.332  |

|     |          |     |    |          |       |
|-----|----------|-----|----|----------|-------|
| 181 | Estimate | 155 | C6 | Oil well | 4.100 |
| 182 | Estimate | 149 | C6 | Oil well | 4.041 |
| 183 | Estimate | 93  | C7 | Oil well | 3.696 |
| 184 | Estimate | 95  | C7 | Oil well | 3.432 |
| 185 | Estimate | 152 | C6 | Oil well | 2.944 |
| 186 | Estimate | 94  | C7 | Oil well | 2.904 |
| 187 | Estimate | 96  | C6 | Gas well | 2.551 |
| 188 | Estimate | 90  | C8 | Oil well | 2.550 |
| 189 | Estimate | 88  | C8 | Facility | 2.241 |
| 190 | Estimate | 181 | C6 | Facility | 2.186 |
| 191 | Estimate | 156 | C6 | Facility | 2.165 |
| 192 | Estimate | 82  | C8 | Gas well | 2.118 |
| 193 | Estimate | 138 | C7 | Oil well | 2.087 |
| 194 | Estimate | 84  | C8 | Gas well | 1.540 |
| 195 | Estimate | 158 | C6 | Oil well | 1.425 |
| 196 | Estimate | 180 | C6 | Oil well | 1.343 |
| 197 | Estimate | 79  | C6 | Oil well | 1.199 |
| 198 | Estimate | 143 | C7 | Oil well | 1.196 |
| 199 | Estimate | 170 | C6 | Oil well | 1.172 |
| 200 | Estimate | 141 | C7 | Oil well | 1.120 |
| 201 | Estimate | 162 | C6 | Gas well | 0.862 |
| 202 | Estimate | 147 | C7 | Oil well | 0.849 |
| 203 | Estimate | 176 | C6 | Facility | 0.777 |
| 204 | Estimate | 146 | C7 | Oil well | 0.693 |
| 205 | Estimate | 165 | C6 | Facility | 0.683 |
| 206 | Estimate | 77  | C7 | Facility | 0.538 |
| 207 | Estimate | 153 | C6 | Oil well | 0.536 |
| 208 | Estimate | 83  | C8 | Gas well | 0.458 |
| 209 | Estimate | 76  | C6 | Facility | 0.446 |
| 210 | Estimate | 92  | C7 | Oil well | 0.440 |
| 211 | Estimate | 160 | C6 | Oil well | 0.413 |
| 212 | Estimate | 166 | C6 | Oil well | 0.366 |
| 213 | Estimate | 151 | C6 | Oil well | 0.322 |
| 214 | Estimate | 161 | C6 | Oil well | 0.257 |
| 215 | Estimate | 175 | C6 | Facility | 0.247 |
| 216 | Estimate | 144 | C7 | Oil well | 0.246 |
| 217 | Estimate | 154 | C6 | Oil well | 0.232 |
| 218 | Estimate | 157 | C6 | Oil well | 0.220 |
| 219 | Estimate | 87  | C8 | Facility | 0.215 |
| 220 | Estimate | 135 | C7 | Oil well | 0.210 |
| 221 | Estimate | 171 | C6 | Oil well | 0.175 |
| 222 | Estimate | 179 | C6 | Oil well | 0.167 |
| 223 | Estimate | 139 | C7 | Oil well | 0.165 |
| 224 | Estimate | 148 | C6 | Facility | 0.160 |
| 225 | Estimate | 145 | C7 | Oil well | 0.112 |
| 226 | Estimate | 80  | C8 | Gas well | 0.094 |
| 227 | Estimate | 85  | C8 | Gas well | 0.045 |
| 228 | Estimate | 142 | C7 | Oil well | 0.045 |

|     |          |     |     |                |        |
|-----|----------|-----|-----|----------------|--------|
| 229 | Estimate | 167 | C6  | Oil well       | 0.032  |
| 230 | Estimate | 178 | C6  | Oil well       | 0.029  |
| 231 | Estimate | 177 | C6  | Facility       | 0.015  |
| 232 | Estimate | 168 | C6  | Oil well       | 0.014  |
| 233 | Estimate | 164 | C6  | Oil well       | 0.006  |
| 234 | Estimate | 163 | C6  | Oil well       | 0.006  |
| 235 | Estimate | 150 | C6  | Oil well       | 0.005  |
| 236 | Estimate | 169 | C6  | Oil well       | 0.004  |
| 237 | Estimate | 174 | C6  | Oil well       | 0.003  |
| 238 | Estimate | 172 | C6  | Oil well       | 0.001  |
| 239 | MBA      | 318 | C8  | Oil park       | 50.640 |
| 240 | MBA      | 326 | C5A | Oil well       | 17.593 |
| 241 | MBA      | 317 | 6   | Gas facility   | 9.378  |
| 242 | MBA      | 316 | 7   | Oil deposit    | 7.848  |
| 243 | MBA      | 336 | C5A | Oil facility   | 7.526  |
| 244 | MBA      | 315 | 6   | Oil well       | 6.480  |
| 245 | MBA      | 339 | C5A | Oil well       | 5.575  |
| 246 | MBA      | 314 | 6   | Oil park       | 5.328  |
| 247 | MBA      | 331 | C4  | Oil well       | 4.822  |
| 248 | MBA      | 330 | C5A | Oil well       | 4.757  |
| 249 | MBA      | 313 | 6   | Oil well       | 4.080  |
| 250 | MBA      | 312 | 6   | Oil well       | 3.618  |
| 251 | MBA      | 340 | C5A | Oil well       | 3.331  |
| 252 | MBA      | 325 | C5A | Oil well       | 2.943  |
| 253 | MBA      | 324 | C5A | Oil well       | 2.630  |
| 254 | MBA      | 338 | C4  | Oil well       | 2.280  |
| 255 | MBA      | 311 | 6   | Oil well       | 2.148  |
| 256 | MBA      | 335 | C5A | Oil facility   | 2.033  |
| 257 | MBA      | 337 | C4  | Unknown        | 2.032  |
| 258 | MBA      | 319 | C2  | Oil well       | 1.927  |
| 259 | MBA      | 320 | C2  | Oil well       | 1.796  |
| 260 | MBA      | 310 | 6   | Oil park       | 1.716  |
| 261 | MBA      | 309 | 8   | Oil well       | 1.710  |
| 262 | MBA      | 308 | 6   | Oil well       | 1.467  |
| 263 | MBA      | 307 | 6   | Oil well       | 1.296  |
| 264 | MBA      | 306 | 8   | Oil well       | 0.960  |
| 265 | MBA      | 305 | 6   | Other facility | 0.918  |
| 266 | MBA      | 304 | 6   | Oil well       | 0.876  |
| 267 | MBA      | 303 | 6   | Oil well       | 0.846  |
| 268 | MBA      | 321 | C5A | Oil well       | 0.831  |
| 269 | MBA      | 302 | 6   | Oil well       | 0.720  |
| 270 | MBA      | 327 | C5A | Oil well       | 0.550  |
| 271 | MBA      | 301 | 6   | Oil park       | 0.540  |
| 272 | MBA      | 322 | C4  | Oil well       | 0.406  |
| 273 | MBA      | 342 | C5A | Oil well       | 0.355  |
| 274 | MBA      | 300 | 7   | Oil well       | 0.306  |
| 275 | MBA      | 299 | 6   | Oil well       | 0.252  |
| 276 | MBA      | 333 | C2  | Gas well       | 0.243  |

|     |       |     |     |          |       |
|-----|-------|-----|-----|----------|-------|
| 277 | MBA   | 323 | C5A | Oil well | 0.229 |
| 278 | MBA   | 298 | 7   | Oil well | 0.198 |
| 279 | MBA   | 334 | C5A | Oil well | 0.196 |
| 280 | MBA   | 341 | C2  | Unknown  | 0.176 |
| 281 | MBA   | 329 | C5A | Oil well | 0.106 |
| 282 | MBA   | 332 | C2  | Gas well | 0.042 |
| 283 | MBA   | 328 | C5A | Oil well | 0.000 |
| 284 | BDL** | 187 | C7  | Oil well | 0.803 |
| 285 | BDL** | 183 | C7  | Oil well | 0.459 |
| 286 | BDL** | 186 | C7  | Oil well | 0.360 |
| 287 | BDL** | 197 | C6  | Oil well | 0.250 |
| 288 | BDL** | 199 | C6  | Oil well | 0.123 |
| 289 | BDL** | 182 | C7  | Oil well | 0.112 |
| 290 | BDL** | 106 | C7  | Gas well | 0.105 |
| 291 | BDL** | 196 | C6  | Oil well | 0.080 |
| 292 | BDL** | 110 | C8  | Oil well | 0.079 |
| 293 | BDL** | 112 | C8  | Gas well | 0.079 |
| 294 | BDL** | 115 | C8  | Gas well | 0.079 |
| 295 | BDL** | 184 | C7  | Gas well | 0.051 |
| 296 | BDL** | 188 | C7  | Oil well | 0.049 |
| 297 | BDL** | 117 | C8  | Gas well | 0.039 |
| 298 | BDL** | 119 | C8  | Gas well | 0.039 |
| 299 | BDL** | 121 | C8  | Gas well | 0.039 |
| 300 | BDL** | 195 | C6  | Facility | 0.033 |
| 301 | BDL** | 189 | C7  | Oil well | 0.033 |
| 302 | BDL** | 131 | C7  | Oil well | 0.030 |
| 303 | BDL** | 133 | C7  | Oil well | 0.030 |
| 304 | BDL** | 134 | C7  | Oil well | 0.030 |
| 305 | BDL** | 200 | C6  | Oil well | 0.013 |
| 306 | BDL** | 103 | C7  | Oil well | 0.012 |
| 307 | BDL** | 102 | C6  | Oil well | 0.010 |
| 308 | BDL** | 185 | C7  | Oil well | 0.009 |
| 309 | BDL** | 194 | C6  | Oil well | 0.008 |
| 310 | BDL** | 108 | C7  | Oil well | 0.007 |
| 311 | BDL** | 109 | C7  | Oil well | 0.007 |
| 312 | BDL** | 113 | C8  | Gas well | 0.006 |
| 313 | BDL** | 114 | C8  | Gas well | 0.006 |
| 314 | BDL** | 104 | C7  | Oil well | 0.006 |
| 315 | BDL** | 105 | C7  | Oil well | 0.006 |
| 316 | BDL** | 107 | C7  | Oil well | 0.006 |
| 317 | BDL** | 111 | C8  | Gas well | 0.006 |
| 318 | BDL** | 192 | C6  | Oil well | 0.004 |
| 319 | BDL** | 124 | C8  | Gas well | 0.003 |
| 320 | BDL** | 125 | C8  | Gas well | 0.003 |
| 321 | BDL** | 190 | C7  | Oil well | 0.003 |
| 322 | BDL** | 127 | C8  | Gas well | 0.003 |
| 323 | BDL** | 128 | C8  | Gas well | 0.003 |
| 324 | BDL** | 129 | C8  | Gas well | 0.003 |

|     |       |     |     |          |       |
|-----|-------|-----|-----|----------|-------|
| 325 | BDL** | 130 | C7  | Oil well | 0.003 |
| 326 | BDL** | 132 | C7  | Oil well | 0.002 |
| 327 | BDL** | 120 | C8  | Oil well | 0.002 |
| 328 | BDL** | 122 | C8  | Oil well | 0.002 |
| 329 | BDL** | 126 | C8  | Oil well | 0.002 |
| 330 | BDL** | 191 | C7  | Oil well | 0.001 |
| 331 | BDL** | 193 | C6  | Facility | 0.001 |
| 332 | BDL** | 198 | C6  | Oil well | 0.001 |
| 333 | BDL** | 123 | C8  | Facility | 0.001 |
| 334 | BDL** | 99  | C7  | Gas well | 0.001 |
| 335 | BDL** | 100 | C5A | Oil well | 0.001 |
| 336 | BDL** | 101 | C5A | Oil well | 0.001 |
| 337 | BDL** | 116 | C8  | Facility | 0.000 |
| 338 | BDL** | 118 | C8  | Facility | 0.000 |

584 \*Emission rate for this site is the sum of quantified emissions from a group of three sites  
585 where their contribution to the measured emission plume could not be distinguished.

586 \*\*BDL values are only used for the derivation of the detection limit and the fraction of  
587 non-detects for the TDM dataset. They are not used for the emission quantification.  
588

## 589 References

590 Alvarez, R. A., Zavala-Araiza, D., Lyon, D. R., Allen, D. T., Barkley, Z. R., Brandt, A. R., Davis, K. J., Herndon,  
591 S. C., Jacob, D. J., Karion, A., Kort, E. A., Lamb, B. K., Lauvaux, T., Maasackers, J. D., Marchese, A. J., Omara,  
592 M., Pacala, S. W., Peischl, J., Robinson, A. L., Shepson, P. B., Sweeney, C., Townsend-Small, A., Wofsy, S.  
593 C., and Hamburg, S. P.: Assessment of methane emissions from the U.S. oil and gas supply chain, *Science*,  
594 361, 186–188, <https://doi.org/10.1126/science.aar7204>, 2018.

595 Bacharach, I. N. C.: Hi flowR sampler for natural gas leak rate measurement, 2015.

596 Canty, A. and Ripley, B.: boot: Bootstrap R (S-Plus) Functions., R package version 1.3-28, 2021.

597 Delre, A., Hensen, A., Velzeboer, I., van den Bulk, P., Edjabou, M. E., and Scheutz, C.: Methane and ethane  
598 emission quantifications from onshore oil and gas sites in Romania, using a tracer gas dispersion method,  
599 *Elementa: Science of the Anthropocene*, 10, 000111, <https://doi.org/10.1525/elementa.2021.000111>,  
600 2022.

601 Hanna, S. R., Briggs, G. A., and Hosker, J.: Handbook on atmospheric diffusion, National Oceanic and  
602 Atmospheric Administration, Oak Ridge, TN (USA). Atmospheric Turbulence and Diffusion Lab.,  
603 <https://doi.org/10.2172/5591108>, 1982.

604 Korbeń, P., Jagoda, P., Maazallahi, H., Kammerer, J., Nećki, J. M., Wietzel, J. B., Bartyzel, J., Radovici, A.,  
605 Zavala-Araiza, D., Röckmann, T., and Schmidt, M.: Quantification of methane emission rate from oil and  
606 gas wells in Romania using ground-based measurement techniques, *Elementa: Science of the*  
607 *Anthropocene*, 10, 00070, <https://doi.org/10.1525/elementa.2022.00070>, 2022.

608 Lyman, S. N., Tran, T., Mansfield, M. L., and Ravikumar, A. P.: Aerial and ground-based optical gas imaging  
609 survey of Uinta Basin oil and gas wells, *Elementa: Science of the Anthropocene*, 7, 43,  
610 <https://doi.org/10.1525/elementa.381>, 2019.

611 Razali, N. M. and Wah, Y. B.: Power comparisons of shapiro-wilk, kolmogorov-smirnov, lilliefors and  
612 anderson-darling tests, *Journal of statistical modeling and analytics*, 2, 21–33, 2011.

613 Riddick, S. N., Connors, S., Robinson, A. D., Manning, A. J., Jones, P. S. D., Lowry, D., Nisbet, E., Skelton, R.  
614 L., Allen, G., Pitt, J., and Harris, N. R. P.: Estimating the size of a methane emission point source at different  
615 scales: from local to landscape, *Atmospheric Chemistry and Physics*, 17, 7839–7851,  
616 <https://doi.org/10.5194/acp-17-7839-2017>, 2017.

617 Robertson, A. M., Edie, R., Field, R. A., Lyon, D., McVay, R., Omara, M., Zavala-Araiza, D., and Murphy, S.  
618 M.: New Mexico Permian Basin Measured Well Pad Methane Emissions Are a Factor of 5–9 Times Higher  
619 Than U.S. EPA Estimates, *Environ. Sci. Technol.*, 54, 13926–13934,  
620 <https://doi.org/10.1021/acs.est.0c02927>, 2020.

621 Ruckstuhl, A. F., Henne, S., Reimann, S., Steinbacher, M., Vollmer, M. K., O’Doherty, S., Buchmann, B., and  
622 Hueglin, C.: Robust extraction of baseline signal of atmospheric trace species using local regression,  
623 *Atmospheric Measurement Techniques*, 5, 2613–2624, <https://doi.org/10.5194/amt-5-2613-2012>, 2012.

624 Seabold, S. and Perktold, J.: *statsmodels: Econometric and statistical modeling with python*, 9th Python in  
625 Science Conference., 2010.

626 Turner, D.: *Workbook of atmospheric dispersion estimates* (Office of Air Program Pub. No. AP-26),  
627 Washington, DC: Environmental Protection Agency, 1970.

628 Vinković, K., Andersen, T., de Vries, M., Kers, B., van Heuven, S., Peters, W., Hensen, A., van den Bulk, P.,  
629 and Chen, H.: Evaluating the use of an Unmanned Aerial Vehicle (UAV)-based active AirCore system to  
630 quantify methane emissions from dairy cows, *Science of The Total Environment*, 831, 154898,  
631 <https://doi.org/10.1016/j.scitotenv.2022.154898>, 2022.

632 Virtanen, P., Gommers, R., Oliphant, T. E., Haberland, M., Reddy, T., Cournapeau, D., Burovski, E.,  
633 Peterson, P., Weckesser, W., Bright, J., van der Walt, S. J., Brett, M., Wilson, J., Millman, K. J., Mayorov,  
634 N., Nelson, A. R. J., Jones, E., Kern, R., Larson, E., Carey, C. J., Polat, İ., Feng, Y., Moore, E. W., VanderPlas,  
635 J., Laxalde, D., Perktold, J., Cimrman, R., Henriksen, I., Quintero, E. A., Harris, C. R., Archibald, A. M.,  
636 Ribeiro, A. H., Pedregosa, F., van Mulbregt, P., SciPy 1.0 Contributors, Vijaykumar, A., Bardelli, A. P.,  
637 Rothberg, A., Hilboll, A., Kloeckner, A., Scopatz, A., Lee, A., Rokem, A., Woods, C. N., Fulton, C., Masson,  
638 C., Häggström, C., Fitzgerald, C., Nicholson, D. A., Hagen, D. R., Pasechnik, D. V., Olivetti, E., Martin, E.,  
639 Wieser, E., Silva, F., Lenders, F., Wilhelm, F., Young, G., Price, G. A., Ingold, G.-L., Allen, G. E., Lee, G. R.,  
640 Audren, H., Probst, I., Dietrich, J. P., Silterra, J., Webber, J. T., Slavič, J., Nothman, J., Buchner, J., Kulick, J.,  
641 Schönberger, J. L., de Miranda Cardoso, J. V., Reimer, J., Harrington, J., Rodríguez, J. L. C., Nunez-Iglesias,  
642 J., Kuczynski, J., Tritz, K., Thoma, M., Newville, M., Kümmerer, M., Bolingbroke, M., Tartre, M., Pak, M.,  
643 Smith, N. J., Nowaczyk, N., Shebanov, N., Pavlyk, O., Brodtkorb, P. A., Lee, P., McGibbon, R. T., Feldbauer,  
644 R., Lewis, S., Tygier, S., Sievert, S., Vigna, S., Peterson, S., More, S., et al.: SciPy 1.0: fundamental algorithms  
645 for scientific computing in Python, *Nat Methods*, 17, 261–272, [https://doi.org/10.1038/s41592-019-0686-](https://doi.org/10.1038/s41592-019-0686-2)  
646 [2](https://doi.org/10.1038/s41592-019-0686-2), 2020.

647 Yacovitch, T. I., Herndon, S. C., Pétron, G., Kofler, J., Lyon, D., Zahniser, M. S., and Kolb, C. E.: Mobile  
648 Laboratory Observations of Methane Emissions in the Barnett Shale Region, *Environ. Sci. Technol.*, 49,  
649 7889–7895, <https://doi.org/10.1021/es506352j>, 2015.

650 Zavala-Araiza, D., Lyon, D. R., Alvarez, R. A., Davis, K. J., Harriss, R., Herndon, S. C., Karion, A., Kort, E. A.,  
651 Lamb, B. K., Lan, X., Marchese, A. J., Pacala, S. W., Robinson, A. L., Shepson, P. B., Sweeney, C., Talbot, R.,  
652 Townsend-Small, A., Yacovitch, T. I., Zimmerle, D. J., and Hamburg, S. P.: Reconciling divergent estimates  
653 of oil and gas methane emissions, *Proceedings of the National Academy of Sciences*, 112, 15597–15602,  
654 <https://doi.org/10.1073/pnas.1522126112>, 2015.

655 Zavala-Araiza, D., Herndon, S. C., Roscioli, J. R., Yacovitch, T. I., Johnson, M. R., Tyner, D. R., Omara, M.,  
656 and Knighton, B.: Methane emissions from oil and gas production sites in Alberta, Canada, *Elementa: Science of the Anthropocene*, 6, 27, <https://doi.org/10.1525/elementa.284>, 2018.
